# Supplementary material for: Genetic Basis of Potato Tuber Defects and Identification of Heat-Tolerant Clones
Source: MDPI journal article supplement (doi:10.3390/plants13050616), 2024-02-23
Supplement: s1 [file s1]

## Supplementary Figures

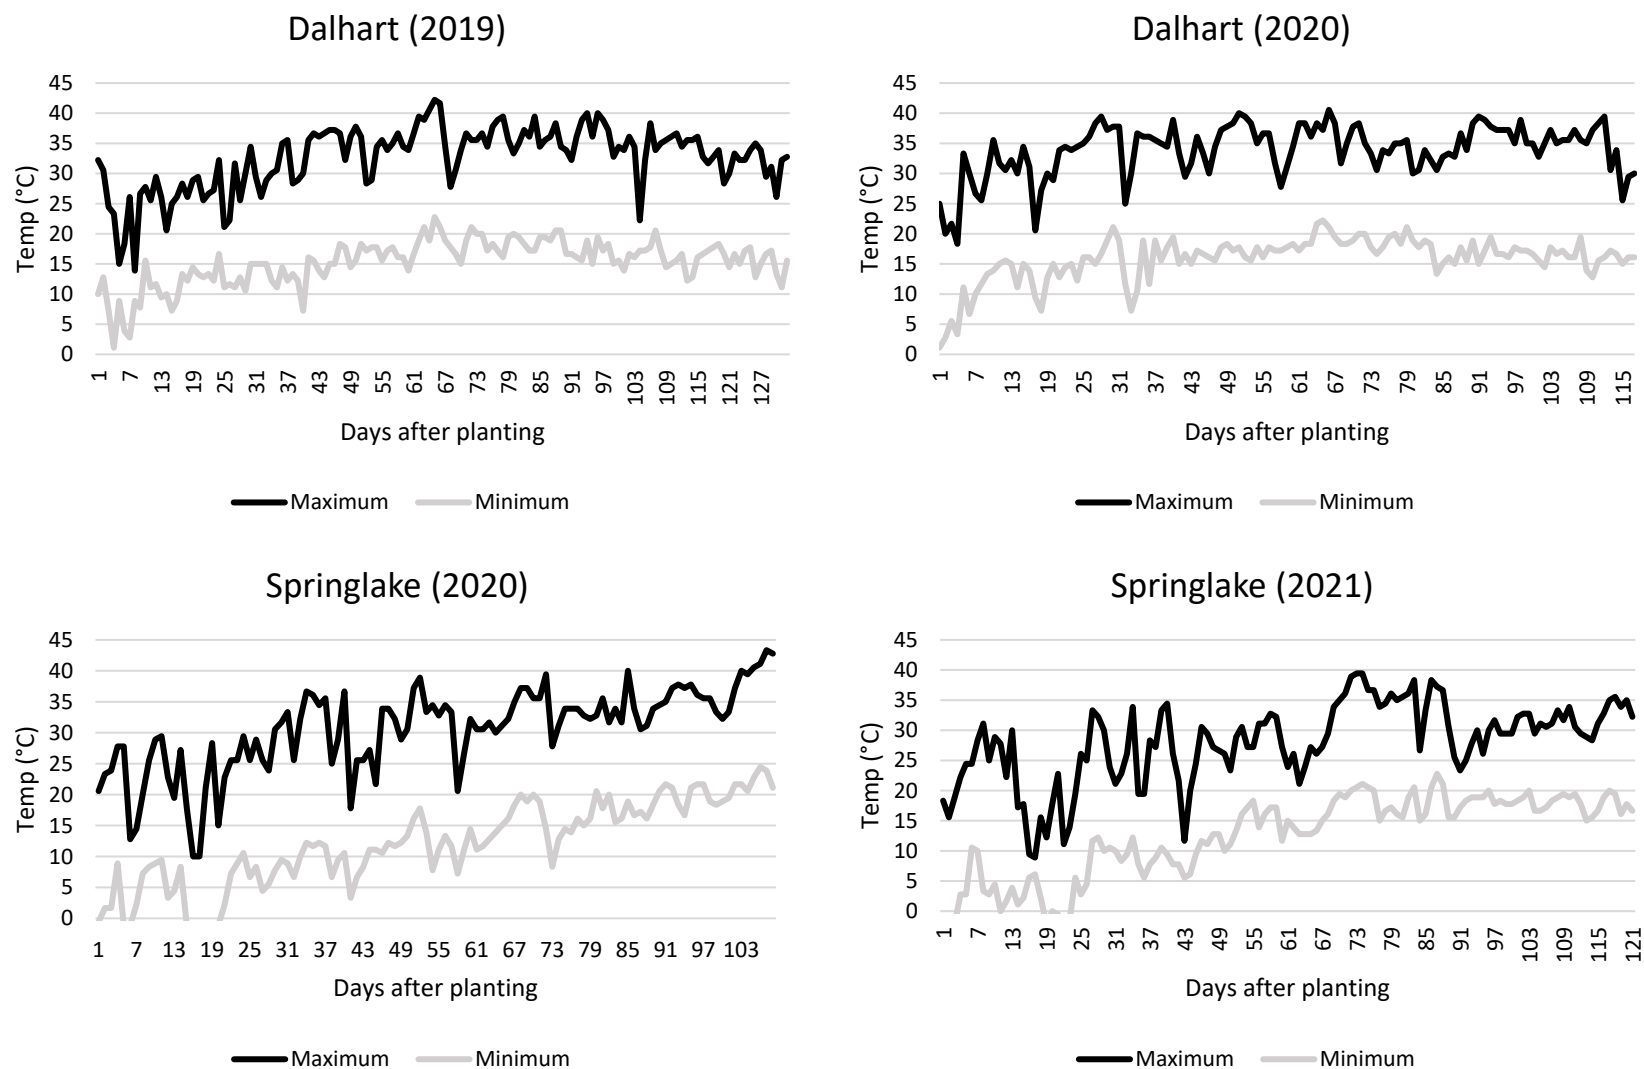

**Figure S1.** Temperature conditions during the potato crop period in Dalhart (2019 and 2020) and Springlake (2020 and 2021), Texas.

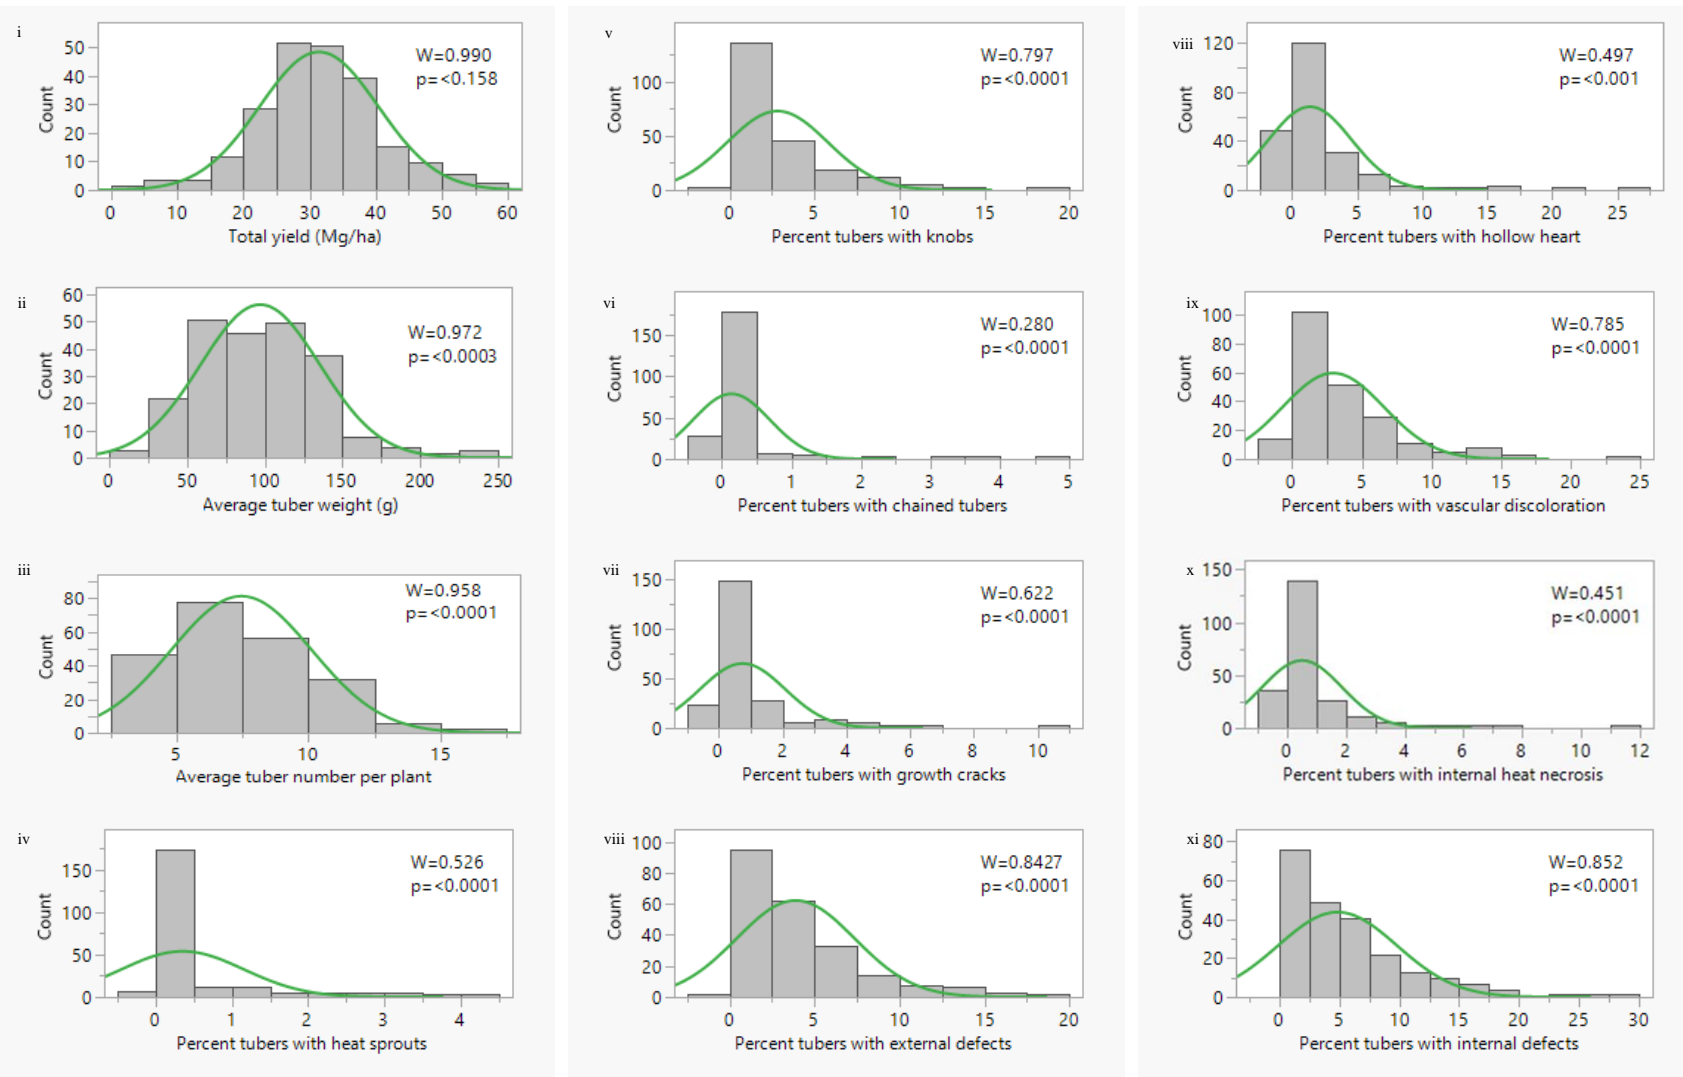

**Figure S2.** Distribution of potato yield and tuber defect traits measured in 217 potato genotypes in Dalhart (2019 and 2020) and Springlake (2020 and 2021).

Reliability of total yield

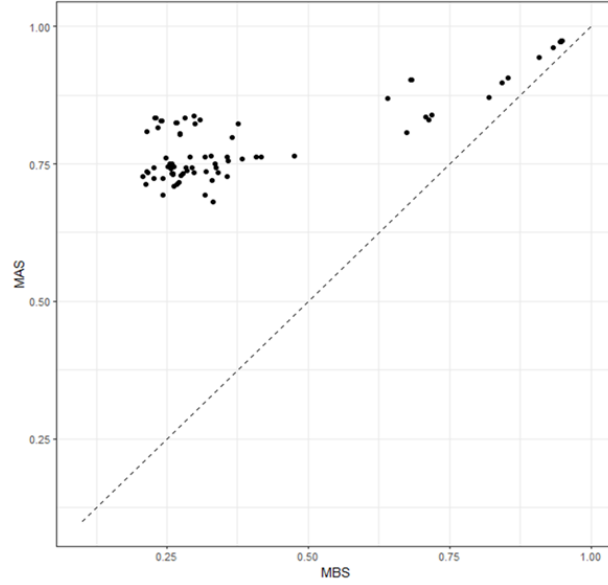

Reliability of yield without culls

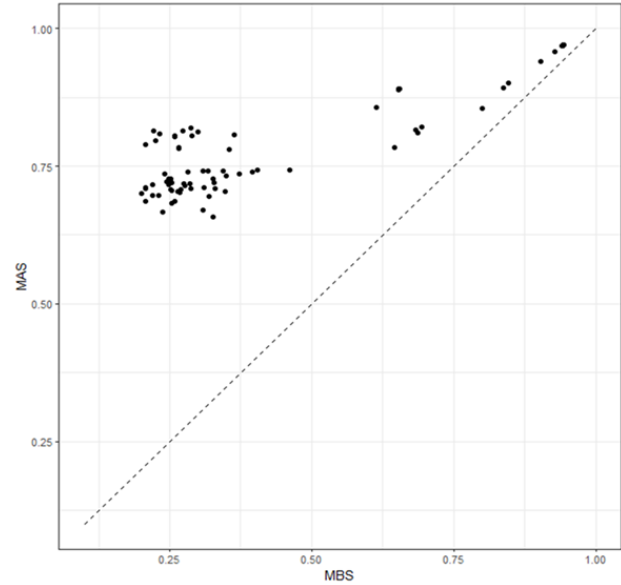

Reliability of culls yield

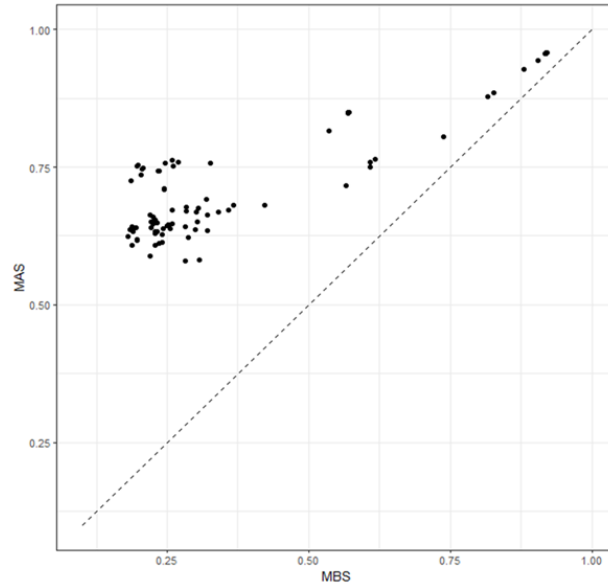

Reliability of average tuber weight

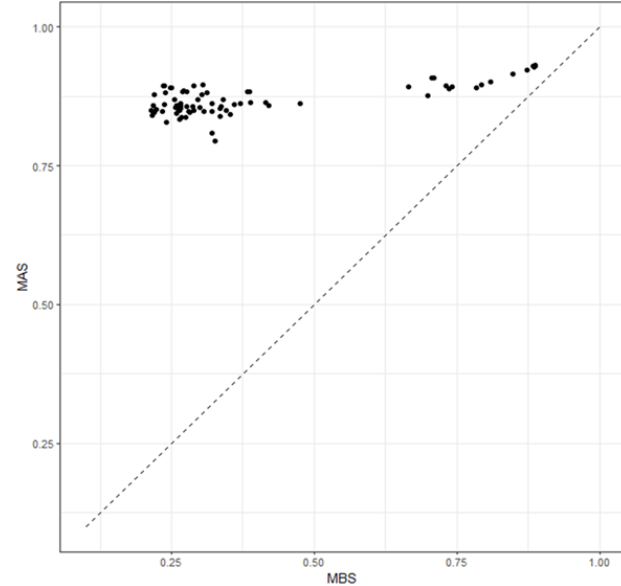

Reliability of tuber number per plant

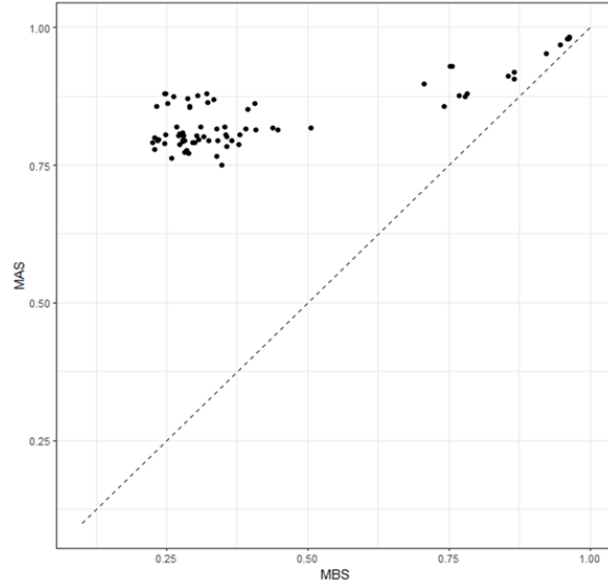

Reliability of percent tubers with heat sprouts

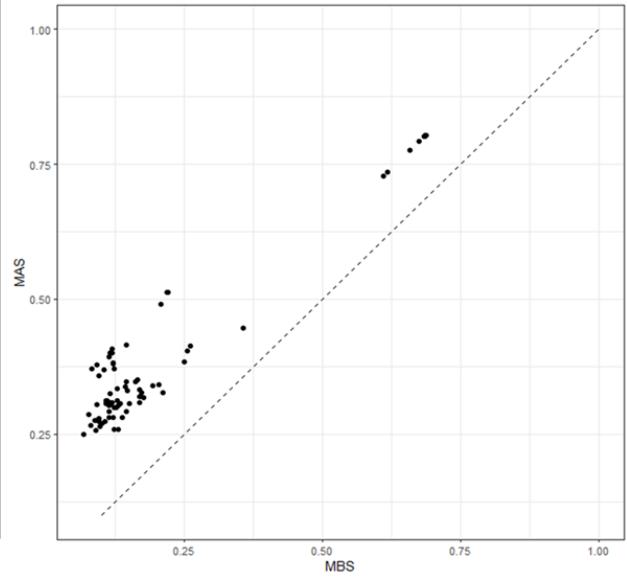

Reliability of percent tubers with knobs

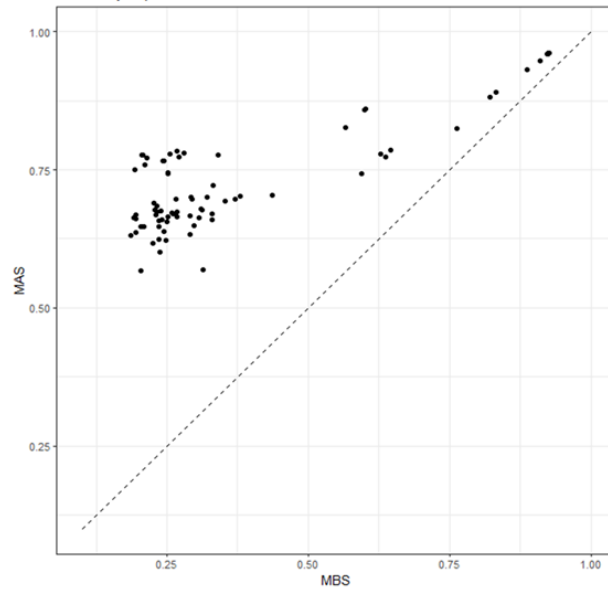

Reliability of percent tubers with chained tubers

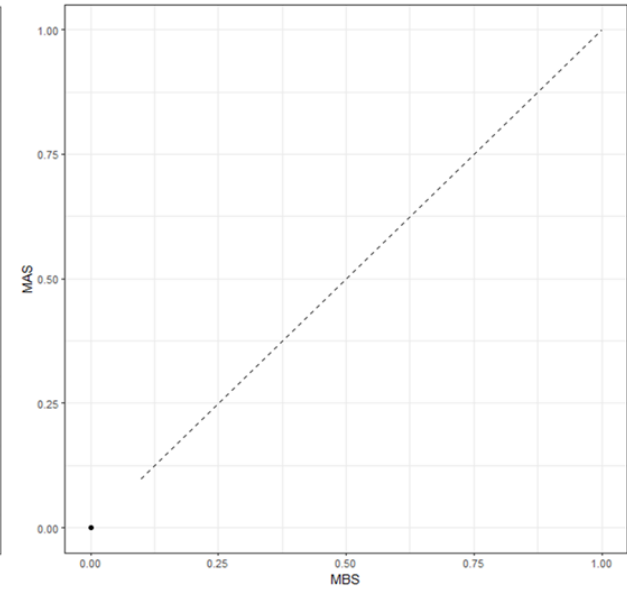

Reliability of percent tubers with growth cracks

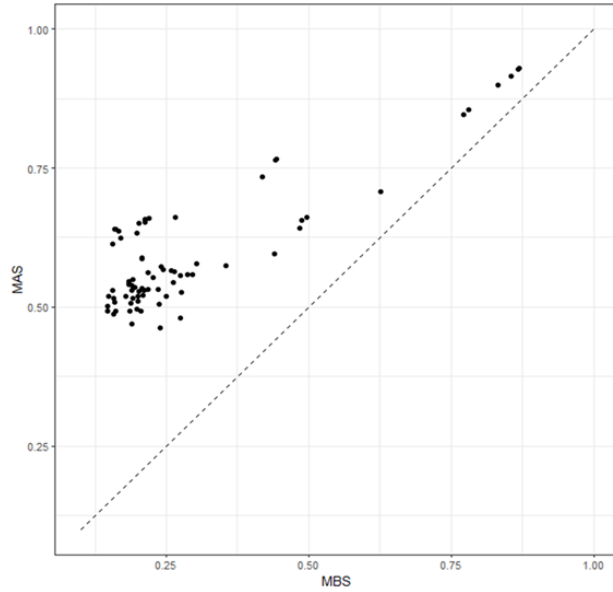

Reliability of percent tubers with external defects

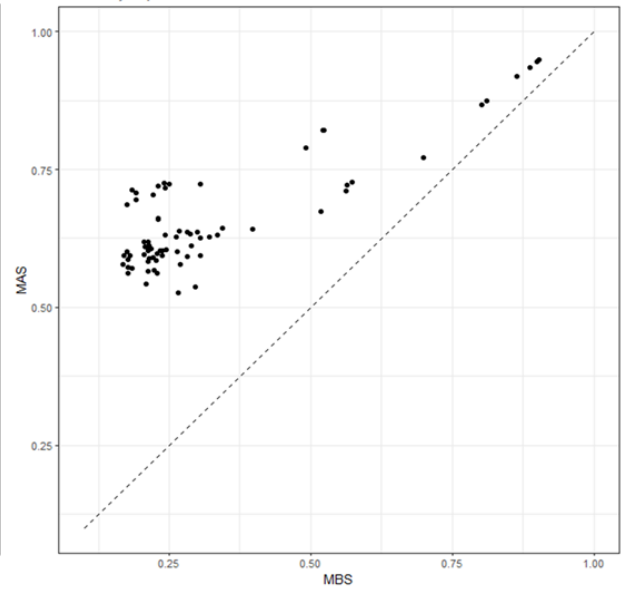

Reliability of percent tubers with hollow heart

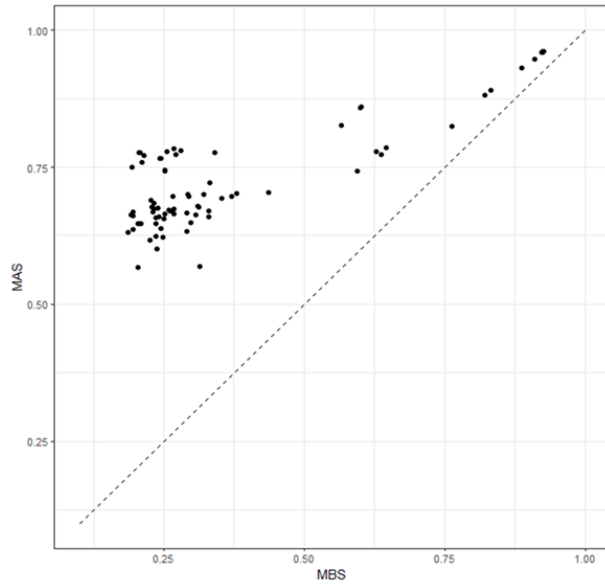

Reliability of percent tubers with vascular discoloration

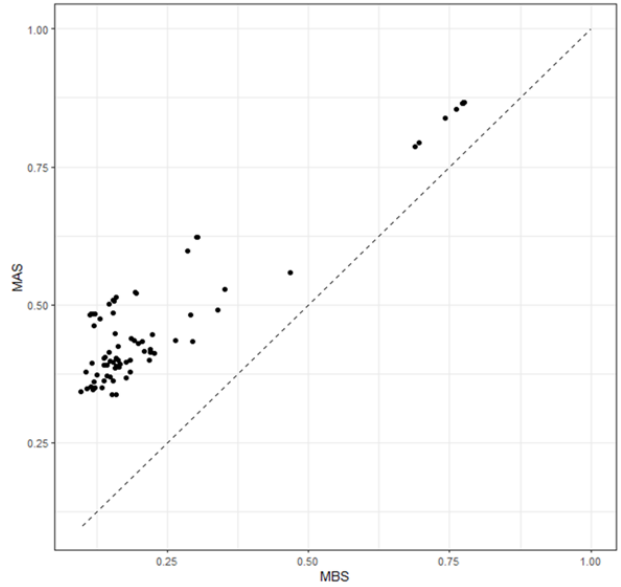

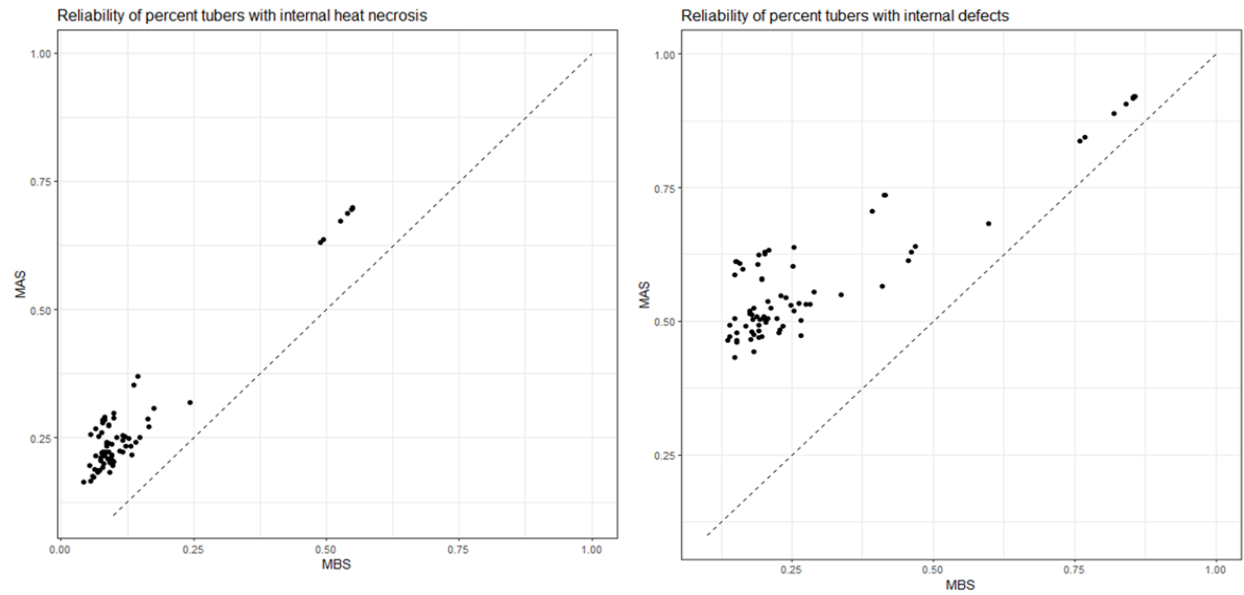

**Figure S3.** Comparison of the reliability of the phenotypic predictions for Aberdeen crossed clones in the dataset (86 clones) when phenotypic values were predicted based on both observed phenotype and marker data (marker-assisted selection - MAS) and when only on marker data (no observed phenotype) (marker-based selection - MBS).
