# Supplementary material for: Genetic Basis of Potato Tuber Defects and Identification of Heat-Tolerant Clones
Source: Plants (Basel). 2024 Feb 23;13(5):616. doi: 10.3390/plants13050616 (PMC10934851; doi:10.3390/plants13050616)
Supplement: Supplementary file 1 [file plants-13-00616-s001.zip › Supplementary figures and tables_GWAS.xlsx]

## Sheet: Table S1 
Table S1| Planting and harvesting dates of 217 potato clones in Dalhart and Springlake, Texas, during 2019, 2020, and 2021.
Dalhart				Springlake
Year	Planting Date	Harvesting Date	Crop Length	Year	Planting Date	Harvesting Date	Crop Length
2019	2023-05-16	2023-09-24	131	2020	2023-03-30	2023-07-15	107
2020	2023-05-09	2023-09-02	117	2021	2023-03-31	2023-07-29	120

## Sheet: Table S2
Table S2| Number of SNPs per chromosome after filtering and size of each chromosome.
Chromosome	Number of filtered SNPs	Chromosome length (bp)
1	1389	88663952
2	1033	48614681
3	917	62190286
4	909	72208621
5	829	52070158
6	815	59532096
7	788	56760843
8	750	56938457
9	721	61540751
10	617	59756223
11	747	45475667
12	591	61165649
Total	10106

## Sheet: Table S3
Table S3|The genes retrieved from the potato reference genome to find possible candidate genes from the QTL's genomic regions spanning upto 250kbp.
S.N	Trait	SNP at QTL Peak	Chr.	Peak position (bp)	Gene ID	Annotation	Vicinity from SNPs(kbp)
1	Percent chain tuber	solcap_snp_c2_30973	1	88322772	PGSC0003DMG400014661	Conserved gene of unknown function	1.3
2					PGSC0003DMG401014675	Conserved gene of unknown function	11.9
3					PGSC0003DMG400014684	Integrase core domain containing protein	12.6
4					PGSC0003DMG400014662	RWP-RK domain-containing protein	16.4
5					PGSC0003DMG402014675	Gene of unknown function	16.5
6					PGSC0003DMG400014676	Pentatricopeptide repeat-containing protein	20.1
7					PGSC0003DMG400014660	Conserved gene of unknown function	21.2
8					PGSC0003DMG400014677	Glycosyltransferase QUASIMODO1	24.4
9					PGSC0003DMG400014674	ATSLY1	25
10					PGSC0003DMG400014673	Dimethylaniline monooxygenase	29.5
11					PGSC0003DMG400014678	Serine/threonine-protein kinase cx32	29.8
12					PGSC0003DMG400014679	PGPS/NH21	36.6
13					PGSC0003DMG402014659	Gene of unknown function	38.8
14					PGSC0003DMG401014659	Gene of unknown function	40.9
15					PGSC0003DMG403014680	N-acetylglucosaminyltransferase I	41.8
16					PGSC0003DMG402014680	N-acetylglucosaminyltransferase I	47.4
17					PGSC0003DMG400014685	Gene of unknown function	50.1
18					PGSC0003DMG400014672	C-7 protein	50.6
19					PGSC0003DMG401014680	N-acetylglucosaminyltransferase I	51.7
20					PGSC0003DMG400014657	Glutathione S-transferase/peroxidase	52
21					PGSC0003DMG400014656	Glutathione S-transferase/peroxidase	58.8
22					PGSC0003DMG400014663	Glutamate receptor 3 plant	59.6
23					PGSC0003DMG400014655	Glutathione S-transferase	61.9
24					PGSC0003DMG400035539	Sugar transporter	65.4
25					PGSC0003DMG400014654	Glutathione S-transferase/peroxidase	65.6
26					PGSC0003DMG400014664	Sugar transporter	69.5
27					PGSC0003DMG401014665	Mitochondrial phosphate carrier protein	74.9
28					PGSC0003DMG402014665	Gene of unknown function	76.6
29					PGSC0003DMG400014666	Gene of unknown function	96.8
30					PGSC0003DMG400014681	Pantothenate kinase	105.1
31					PGSC0003DMG400003419	Vacuolar ATPase subunit B	121.8
32					PGSC0003DMG400003417	Conserved gene of unknown function	127.3
33					PGSC0003DMG400003416	Serine/threonine protein phosphatase 2A 57 kDa regulatory subunit B' beta isoform	150.9
34					PGSC0003DMG400003415	Neutral amino acid transport protein	153.2
35					PGSC0003DMG400044816	Gene of unknown function	163.3
36					PGSC0003DMG400018627	Structural constituent of ribosome	168.8
37					PGSC0003DMG400018628	Conserved gene of unknown function	174.9
38					PGSC0003DMG400018640	Conserved gene of unknown function	180.3
39					PGSC0003DMG400014669	Gene of unknown function	191
40					PGSC0003DMG400018641	S-adenosyl-methionine-sterol-C-methyltransferase	195.9
41					PGSC0003DMG400018629	Tetracycline transporter	211.9
42					PGSC0003DMG400037545	Aspartic proteinase nepenthesin-1	215.5
43					PGSC0003DMG400018642	WD-repeat protein	221.7
44					PGSC0003DMG401018643	Serine/threonine-protein kinase ATR	241.5
45					PGSC0003DMG402018643	Serine/threonine-protein kinase ATR	243.8
46	Percent hollow heart	solcap_snp_c2_6683	1	1828457	PGSC0003DMG400032200	1,3-beta-glucan synthase	10.4
47					PGSC0003DMG400032150	DEAD/DEAH box helicase family protein	25.9
48					PGSC0003DMG400032149	Structural molecule	32.1
49					PGSC0003DMG400032231	NDR1	44.6
50					PGSC0003DMG400032148	NDR1	48.5
51					PGSC0003DMG400032199	Peroxidase	65.6
52					PGSC0003DMG400032147	Peroxidase	72.3
53					PGSC0003DMG400032202	Callose synthase 3	78.4
54					PGSC0003DMG400032146	10-formyltetrahydrofolate synthetase	82.3
55					PGSC0003DMG400032145	Lipoate-protein ligase B	89.4
56					PGSC0003DMG400032198	Conserved gene of unknown function	96.3
57					PGSC0003DMG400032232	U-box domain-containing protein	99.4
58					PGSC0003DMG400032197	Restricted tev movement 1	101.2
59					PGSC0003DMG400032151	U box	104.2
60					PGSC0003DMG400032144	Cysteine protease ATG4B	107.6
61					PGSC0003DMG401032203	Extensin	115.1
62					PGSC0003DMG400032195	Nse1 non-SMC component of SMC5-6 complex family protein	130.5
63					PGSC0003DMG400032233	Cysteine-rich extensin-2	141
64					PGSC0003DMG402032203	Extensin	146.3
65					PGSC0003DMG401032194	Ubiquitin ligase SINAT2	148.1
66					PGSC0003DMG402032194	Ubiquitin ligase SINAT2	149
67					PGSC0003DMG400032193	GTP-binding protein	156.3
68					PGSC0003DMG400032192	RRNA-processing protein EBP2	160.7
69					PGSC0003DMG400032191	Transcription or splicing factor	165.2
70					PGSC0003DMG400032190	Acidic ribosomal protein P1a	175.7
71					PGSC0003DMG400032204	D12 oleate desaturase	181.9
72					PGSC0003DMG400032189	Metal tolerance protein	183.1
73					PGSC0003DMG402032143	Gene of unknown function	195.9
74					PGSC0003DMG401032143	Conserved gene of unknown function	198.1
75					PGSC0003DMG400032142	Casein kinase	209.5
76					PGSC0003DMG400032152	Enoyl-acyl-carrier-protein reductase	217.5
77					PGSC0003DMG400032187	Tap46	219.7
78					PGSC0003DMG400032236	COG5125	223.4
79					PGSC0003DMG400032141	RRNA-processing protein EBP2	237.7
80					PGSC0003DMG400032153	Conserved gene of unknown function	238.1
81	Average tuber number	solcap_snp_c1_14093	1	73743526	PGSC0003DMG400000239	Arginine/serine-rich splicing factor	0.1
82					PGSC0003DMG400000122	Kinase	7.5
83					PGSC0003DMG400000238	GHMP kinases putative ATP-binding protein	14.4
84					PGSC0003DMG400000237	Conserved gene of unknown function	20.5
85					PGSC0003DMG400000123	Calcium-transporting ATPase, endoplasmic reticulum-type	21.8
86					PGSC0003DMG400000121	Conserved gene of unknown function	24.5
87					PGSC0003DMG400000240	Pentatricopeptide repeat-containing protein	25.1
88					PGSC0003DMG400000241	Spotted leaf protein	30.8
89					PGSC0003DMG400000236	Ormdl	34.4
90					PGSC0003DMG400000120	Dof18	40.1
91					PGSC0003DMG400000242	Pentatricopeptide repeat-containing protein	42.2
92					PGSC0003DMG400000124	RAB11B	48.9
93					PGSC0003DMG400000243	ATP binding protein	60.7
94					PGSC0003DMG400000125	Conserved gene of unknown function	75.5
95					PGSC0003DMG400046434	Cell surface glycoprotein	78.8
96					PGSC0003DMG400000126	Conserved gene of unknown function	83.6
97					PGSC0003DMG400000235	Transducin family protein / WD-40 repeat family protein	88.2
98					PGSC0003DMG400042385	LINE-type retrotransposon LIb DNA, complete sequence, Insertion at the S11 site	92.9
99					PGSC0003DMG400000234	Conserved gene of unknown function	97.3
100					PGSC0003DMG400000127	Cytochrome b5 isoform Cb5-A	97.4
101					PGSC0003DMG400000233	Fiber protein Fb11	103.1
102					PGSC0003DMG400000119	Conserved gene of unknown function	106.2
103					PGSC0003DMG400000244	Cytochrome P450	115.7
104					PGSC0003DMG400039652	Gene of unknown function	118.1
105					PGSC0003DMG400000118	ARF domain class transcription factor	123.7
106					PGSC0003DMG400000128	Ubiquitin fusion protein	135.1
107					PGSC0003DMG400000245	Cysteine-type endopeptidase/ ubiquitin thiolesterase	137.8
108					PGSC0003DMG402000117	Gene of unknown function	145.3
109					PGSC0003DMG400000246	Trehalose-6-phosphate synthase	147.2
110					PGSC0003DMG401000117	Importin-alpha re-exporter	147.5
111					PGSC0003DMG400000247	Gene of unknown function	151.9
112					PGSC0003DMG400044759	Gene of unknown function	153.4
113					PGSC0003DMG400000248	HB1	163.5
114					PGSC0003DMG400000232	Myc2 bHLH protein	174.3
115					PGSC0003DMG400000129	SAUR family protein	191.7
116					PGSC0003DMG400000231	Aspartic proteinase nepenthesin-1	199.2
117					PGSC0003DMG400000116	Gene of unknown function	202.1
118					PGSC0003DMG400000230	Conserved gene of unknown function	207.8
119					PGSC0003DMG400000229	Ubiquitin ligase SINAT3	213.5
120					PGSC0003DMG400000228	EMB1703	219
121					PGSC0003DMG400000115	Conserved gene of unknown function	223.2
122					PGSC0003DMG400000130	Gtpase activating protein	223.9
123					PGSC0003DMG400000114	Phosphatidylinositol 3-and 4-kinase family protein	226.1
124					PGSC0003DMG400000113	Conserved gene of unknown function	232.1
125					PGSC0003DMG400000227	Phragmoplastin	240.4
126					PGSC0003DMG400000112	Gene of unknown function	247.5
127					PGSC0003DMG400000226	Conserved gene of unknown function	249.7
128	Percent internal heat necrosis	PotVar0049564	1	62154569	PGSC0003DMG402008996	Conserved gene of unknown function	0.1
129					PGSC0003DMG401008996	Uncharacterized GPI-anchored protein	0.8
130					PGSC0003DMG400044436	Conserved gene of unknown function	1.5
131					PGSC0003DMG400009027	Peroxisomal membrane protein pmp34	7.2
132					PGSC0003DMG400009026	Glucose-1-phosphate adenylyltransferase	7.6
133					PGSC0003DMG400008995	Chloroplast RNA helicase VDL isoform 1	13.5
134					PGSC0003DMG400008997	Protein kinase	17.8
135					PGSC0003DMG400009025	E3 ubiquitin-protein ligase RHF1A	29.2
136					PGSC0003DMG400039492	Gene of unknown function	42.2
137					PGSC0003DMG400009028	Conserved gene of unknown function	48.4
138					PGSC0003DMG400008994	Peroxiredoxin	64.6
139					PGSC0003DMG400008993	Conserved gene of unknown function	69.2
140					PGSC0003DMG400008992	Transposon MuDR mudrA	73.6
141					PGSC0003DMG400038547	Gene of unknown function	75
142					PGSC0003DMG400008998	Kinase-associated protein phosphatase 1	89.7
143					PGSC0003DMG400008991	Ubiquitin-activating enzyme E1c	92.6
144					PGSC0003DMG400038631	chromo' domain containing protein	101.4
145					PGSC0003DMG400008999	Conserved gene of unknown function	103.3
146					PGSC0003DMG400009000	Peroxisomal targeting signal type 2 receptor	110.9
147					PGSC0003DMG400008990	Conserved gene of unknown function	110.9
148					PGSC0003DMG400009029	Ran GTPase-activating protein 2	134.7
149					PGSC0003DMG400009024	Carbohydrate kinase family	140.2
150					PGSC0003DMG400008989	CONSTANS interacting protein 2b	148.4
151					PGSC0003DMG400009002	Long cell-linked locus protein	152.9
152					PGSC0003DMG400037362	Long cell-linked locus protein	160.4
153					PGSC0003DMG400041513	Gene of unknown function	162.1
154					PGSC0003DMG400009031	Ctp synthase	164.8
155					PGSC0003DMG400009055	RNase H family protein	186.8
156					PGSC0003DMG400008988	Aluminum-induced protein	191
157					PGSC0003DMG400043959	Gene of unknown function	194.6
158					PGSC0003DMG400035683	Gene of unknown function	208.7
159					PGSC0003DMG400034503	Aquaporin, MIP family, NIP subfamily	226.3
160					PGSC0003DMG402008987	Basic 7S globulin 2 small subunit	230.4
161					PGSC0003DMG400009003	Conserved gene of unknown function	237
162					PGSC0003DMG401008987	Basic 7S globulin 2 small subunit	242.1
163	Percent hollow heart	PotVar0039493	2	20838472	PGSC0003DMG400015489	Transcription factor APFI	3.4
164					PGSC0003DMG400015490	Galactinol synthase	11.2
165					PGSC0003DMG400015488	Alpha/beta hydrolase	12.1
166					PGSC0003DMG400015510	Conserved gene of unknown function	13.6
167					PGSC0003DMG400015511	Conserved gene of unknown function	20.7
168					PGSC0003DMG400036479	Gene of unknown function	27.5
169					PGSC0003DMG400015491	Tm-1^GCR26 protein	34.8
170					PGSC0003DMG400015492	ATP binding protein	40.5
171					PGSC0003DMG400015513	Gene of unknown function	43.2
172					PGSC0003DMG400015493	Thioredoxin domain-containing protein	48.4
173					PGSC0003DMG400015494	BZIP transcription factor BZI-2	51.4
174					PGSC0003DMG400015495	Dehydrin DH2a	60.1
175					PGSC0003DMG400015496	Conserved gene of unknown function	62.8
176					PGSC0003DMG401015497	RNA pseudourine synthase 5	72.8
177					PGSC0003DMG402015497	Pericarp peroxidase 3	78
178					PGSC0003DMG400042503	chromo' domain containing protein	79.9
179					PGSC0003DMG400015514	D-lactate dehydrognease 2	85.5
180					PGSC0003DMG400015509	RING zinc finger protein	85.8
181					PGSC0003DMG400015486	Pentatricopeptide repeat-containing protein	88.8
182					PGSC0003DMG400015485	Cysteine synthase	93.2
183					PGSC0003DMG400015515	Green ripe-like 2	96.9
184					PGSC0003DMG400015508	Syntaxin	98.2
185					PGSC0003DMG400015484	Laccase	101.5
186					PGSC0003DMG400015516	Short internodes 2	104.2
187					PGSC0003DMG400015507	Phosphoric diester hydrolase	107.7
188					PGSC0003DMG400015483	Anaphase-promoting complex	112.1
189					PGSC0003DMG400015482	Transcription factor bHLH63	119.5
190					PGSC0003DMG400012014	GATA domain class transcription factor	126.2
191					PGSC0003DMG402012010	Nuclear receptor binding set domain containing protein 1, nsd	129.2
192					PGSC0003DMG400015506	Protein MSP1	133.9
193					PGSC0003DMG401012010	Nuclear receptor binding set domain containing protein 1, nsd	135.5
194					PGSC0003DMG400015481	Gene of unknown function	143.5
195					PGSC0003DMG400012013	Conserved gene of unknown function	150.5
196					PGSC0003DMG400012012	Fructose-bisphosphate aldolase	156.4
197					PGSC0003DMG400012011	Kinesin motor family protein	163.3
198					PGSC0003DMG400015505	Anthranilate N-benzoyltransferase protein	165.9
199					PGSC0003DMG400012008	BURP domain-containing protein	185.2
200					PGSC0003DMG400042914	Gene of unknown function	194.6
201					PGSC0003DMG400015480	Endonuclease/exonuclease/phosphatase	232.2
202					PGSC0003DMG400015479	3-methyladenine DNA glycosylase	242.6
203	Percent growth crack	PotVar0095359	3	38707513	PGSC0003DMG400014826	Salt tolerance protein 3	2.5
204					PGSC0003DMG400046676	Peroxisomal biogenesis factor	10.8
205					PGSC0003DMG402014825	Pentatricopeptide repeat-containing protein	11.7
206					PGSC0003DMG401014814	SKP1 1	12.2
207					PGSC0003DMG401014825	Gene of unknown function	15
208					PGSC0003DMG400014815	DUF614 containing protein	32.7
209					PGSC0003DMG400014824	Glycerol-3-phosphate transporter	50.1
210					PGSC0003DMG400014816	Conserved gene of unknown function	53.6
211					PGSC0003DMG400014817	Conserved gene of unknown function	58.5
212					PGSC0003DMG400014827	Conserved gene of unknown function	63.9
213					PGSC0003DMG400014818	Aquaporin, MIP family	69.6
214					PGSC0003DMG400014819	Nitric oxide synthase-associated protein I	76.6
215					PGSC0003DMG400014823	Xyloglucan endotransglucosylase-hydrolase XTH3	78.5
216					PGSC0003DMG400014822	Aldo-keto reductase	104.4
217					PGSC0003DMG400039522	Aldo-keto reductase	116.5
218					PGSC0003DMG400041306	Aldo-keto reductase	134.4
219					PGSC0003DMG400028058	HyPRP	139.2
220					PGSC0003DMG400028059	HyPRP	147.3
221					PGSC0003DMG400014829	Ubiquitin-protein ligase	152.7
222					PGSC0003DMG400028060	HyPRP	175.5
223					PGSC0003DMG400018849	Leucine-rich repeat receptor kinase	185.5
224					PGSC0003DMG400018848	Gene of unknown function	217.9
225					PGSC0003DMG400018857	Conserved gene of unknown function	233.2
226					PGSC0003DMG400018847	Zinc finger protein	242.5
227	Percent hollow heart	solcap_snp_c2_55279	3	45386107	PGSC0003DMG400009081	Pectin methylesterase 1	1.2
228					PGSC0003DMG400009125	Ubiquitin	7.2
229					PGSC0003DMG400009138	Gene of unknown function	18.8
230					PGSC0003DMG400039885	Gene of unknown function	35.9
231					PGSC0003DMG400009080	Triacylglycerol lipase	41.1
232					PGSC0003DMG400009126	Dipeptidyl peptidase IV	46.1
233					PGSC0003DMG402009127	Gene of unknown function	53
234					PGSC0003DMG401009127	Calcium sensor calcineurin B	54.8
235					PGSC0003DMG400009082	WREBP-2 protein	72.8
236					PGSC0003DMG400009124	Conserved gene of unknown function	79.4
237					PGSC0003DMG400009083	Surfeit locus protein 5 family protein	80.2
238					PGSC0003DMG400009128	40S ribosomal protein S12	83.3
239					PGSC0003DMG400009123	Salt tolerance protein 5	86
240					PGSC0003DMG400009084	Pentatricopeptide repeat-containing protein	89.1
241					PGSC0003DMG400009129	Ubiquitin ligase SINAT3	93.4
242					PGSC0003DMG400009130	ATP-dependent clp protease ATP-binding subunit clpx	104.3
243					PGSC0003DMG400009122	Conserved gene of unknown function	132.8
244					PGSC0003DMG400009121	SET domain protein	144.9
245					PGSC0003DMG400009131	Gene of unknown function	149.1
246					PGSC0003DMG400009085	Hydroxyproline-rich glycoprotein GAS31	152.8
247					PGSC0003DMG400009120	ATP binding protein	154.3
248					PGSC0003DMG400009079	Splicing factor 3a	163.4
249					PGSC0003DMG400009086	SF16	207.4
250					PGSC0003DMG400009118	Conserved gene of unknown function	214.2
251					PGSC0003DMG401018552	Soluble starch synthase 1, chloroplastic/amyloplastic	217.6
252					PGSC0003DMG400009117	Ring finger protein	219.9
253					PGSC0003DMG402018552	Soluble starch synthase 1, chloroplastic/amyloplastic	221.7
254					PGSC0003DMG400009078	Receptor serine/threonine kinase	223.3
255					PGSC0003DMG400009116	Membrane receptor 1	227.3
256					PGSC0003DMG400009115	Membrane receptor 1	231.5
257					PGSC0003DMG400018551	Conserved gene of unknown function	232.3
258					PGSC0003DMG400009114	BRASSINOSTEROID INSENSITIVE 1-associated receptor kinase 1	242.9
259					PGSC0003DMG400018532	Ulp1 protease family, C-terminal catalytic domain containing protein	244.1
260					PGSC0003DMG400009113	Gene of unknown function	247.4
261	Percent internal heat necrosis	PotVar0013873	3	57569599	PGSC0003DMG400014223	4-coumarate--CoA ligase 2	1.3
262					PGSC0003DMG400014222	Zinc finger protein	5.7
263					PGSC0003DMG400014221	Ribulose bisphosphate carboxylase/oxygenase activase, chloroplast	11.5
264					PGSC0003DMG400014224	Amino acid binding protein	13.5
265					PGSC0003DMG400014163	Gene of unknown function	22.4
266					PGSC0003DMG401014164	Gene of unknown function	25.4
267					PGSC0003DMG400014220	Conserved gene of unknown function	25.6
268					PGSC0003DMG402014164	Conserved gene of unknown function	27.9
269					PGSC0003DMG400014162	Gene of unknown function	28.9
270					PGSC0003DMG400014161	Conserved gene of unknown function	34
271					PGSC0003DMG400014219	Phosphate abc transporter	40
272					PGSC0003DMG401014160	Protein WAX2	41.8
273					PGSC0003DMG402014160	Protein WAX2	42.3
274					PGSC0003DMG400014166	U2 small nuclear ribonucleoprotein A	44.8
275					PGSC0003DMG400014225	ERD1 protein, chloroplast	47.8
276					PGSC0003DMG402014218	ATP binding / kinase/ protein kinase/ protein serine/threonine kinase/ protein tyrosine kinase	56
277					PGSC0003DMG400014226	Conserved gene of unknown function	59
278					PGSC0003DMG401014218	Uv excision repair protein rad23	63.4
279					PGSC0003DMG400014159	Membrane protein PB1A10.07c	68.9
280					PGSC0003DMG400014217	Conserved gene of unknown function	75.4
281					PGSC0003DMG400014216	Polygalacturonase	79.5
282					PGSC0003DMG400014158	Conserved gene of unknown function	84.9
283					PGSC0003DMG400014215	Tubby protein	92.1
284					PGSC0003DMG400014157	AP2 domain-containing transcription factor	96.9
285					PGSC0003DMG400014168	Respiratory burst oxidase homolog protein C	100.8
286					PGSC0003DMG400014227	Conserved gene of unknown function	108.2
287					PGSC0003DMG400014156	Aspartic proteinase nepenthesin-1	110.4
288					PGSC0003DMG400014228	Inositol polyphosphate multikinase	114.2
289					PGSC0003DMG400014214	Conserved gene of unknown function	119.8
290					PGSC0003DMG400014155	Conserved gene of unknown function	123.3
291					PGSC0003DMG400014154	Conserved gene of unknown function	129.4
292					PGSC0003DMG400014229	Ebna2 binding protein P100	134.9
293					PGSC0003DMG400014153	Glycosylphosphatidylinositol anchor biosynthesis protein 11	139.7
294					PGSC0003DMG400014213	ATP binding protein	144.7
295					PGSC0003DMG400014230	Amidase	147.2
296					PGSC0003DMG400014169	Alpha/beta fold family protein	151.6
297					PGSC0003DMG400044492	Transposon MuDR mudrA	153.2
298					PGSC0003DMG400014212	Heat shock protein	156.3
299					PGSC0003DMG400014231	Conserved gene of unknown function	157.9
300					PGSC0003DMG400014211	Gene of unknown function	159
301					PGSC0003DMG400014259	Gene of unknown function	160.7
302					PGSC0003DMG400014152	Hydroxycinnamoyl transferase	163.1
303					PGSC0003DMG400014232	Calnexin	165.2
304					PGSC0003DMG400014258	Gene of unknown function	172.2
305					PGSC0003DMG400014257	Acireductone dioxygenase	174.1
306					PGSC0003DMG400014210	DnaJ protein	183.8
307					PGSC0003DMG400014151	GAG1At protein	186.6
308					PGSC0003DMG400014233	Conserved gene of unknown function	191.6
309					PGSC0003DMG400014209	Pentatricopeptide repeat-containing protein	193
310					PGSC0003DMG400014234	Conserved gene of unknown function	193.7
311					PGSC0003DMG400014150	Kinase family protein	199.8
312					PGSC0003DMG400014170	AMP-activated protein kinase, gamma regulatory subunit	203.1
313					PGSC0003DMG400014149	Multidrug Resistance associated Protein 1	206.2
314					PGSC0003DMG400014235	Pentatricopeptide repeat-containing protein	208.1
315					PGSC0003DMG400014236	Succinate/fumarate mitochondrial transporter	215.7
316					PGSC0003DMG400014237	Short-chain dehydrogenase/reductase family protein	227.9
317					PGSC0003DMG400014148	Conserved gene of unknown function	230.6
318					PGSC0003DMG400014171	Conserved gene of unknown function	231.3
319					PGSC0003DMG400014172	Transferase, transferring glycosyl groups	234
320					PGSC0003DMG400014238	Electron transporter	237.4
321					PGSC0003DMG400014146	Formamidopyrimidine-DNA glycosylase	243.2
322	Percent knobs	solcap_snp_c2_12947	4	69185901	PGSC0003DMG400016880	Gene of unknown function	0.1
323					PGSC0003DMG400016889	GNS1/SUR4 membrane family protein	9.4
324					PGSC0003DMG402016888	1-acyl-sn-glycerol-3-phosphate acyltransferase 4	12.9
325					PGSC0003DMG400016890	LIM domain containing protein	18.8
326					PGSC0003DMG401016888	SCUTL2	20.6
327					PGSC0003DMG400016879	Metalloendopeptidase	26.7
328					PGSC0003DMG400046998	S-adenosylmethionine-dependent methyltransferase	45.4
329					PGSC0003DMG400016878	Conserved gene of unknown function	48.3
330					PGSC0003DMG400016891	Inositol polyphosphate 5-phosphatase	52.5
331					PGSC0003DMG400016882	Ubiquitin-protein ligase	61.5
332					PGSC0003DMG400016883	Ribosomal protein S9	66.6
333					PGSC0003DMG400016884	Protein ariadne-1	70.2
334					PGSC0003DMG400016885	EMB2756	76
335					PGSC0003DMG400016892	Conserved gene of unknown function	79.6
336					PGSC0003DMG400016886	Plastidial lipoyltransferase 2	84.8
337					PGSC0003DMG400016893	Conserved gene of unknown function	87.7
338					PGSC0003DMG400016887	Allene oxide synthase	95.7
339					PGSC0003DMG400003343	Kinase	108.4
340					PGSC0003DMG400027846	Cell cycle control protein cwf22	123.1
341					PGSC0003DMG400027854	Conserved gene of unknown function	128.8
342					PGSC0003DMG400003339	F-box and wd40 domain protein	135.1
343					PGSC0003DMG400027855	NAC domain protein	138.8
344					PGSC0003DMG400003344	Dual-specific kinase DSK1	140.8
345					PGSC0003DMG400003345	Cytochrome P450	149.4
346					PGSC0003DMG400027847	Methyltransferase 2	152.8
347					PGSC0003DMG400003346	Cytochrome P450	157
348					PGSC0003DMG400027856	Geranylgeranyl pyrophosphate synthase 2	158.9
349					PGSC0003DMG400027848	Ubiquitin carrier protein	168.7
350					PGSC0003DMG400003340	P450 mono-oxygenase	171.6
351					PGSC0003DMG400003341	Cytochrome P450	174.9
352					PGSC0003DMG400027849	Mature anther-specific protein LAT61	176.8
353					PGSC0003DMG400027857	DNA-3-methyladenine glycosylase	181.3
354					PGSC0003DMG400003342	Cytochrome P450	182.4
355					PGSC0003DMG400027850	Peroxisomal biogenesis factor	185.4
356					PGSC0003DMG400027852	Glucosyltransferase	198.2
357					PGSC0003DMG400027853	Acyltransferase	209.5
358					PGSC0003DMG400027858	Conserved gene of unknown function	217
359					PGSC0003DMG402027859	Heat shock protein binding protein	229.1
360					PGSC0003DMG401027859	J-domain protein required for chloroplast accumulation response 1	230
361					PGSC0003DMG401027860	Small molecule transporter	235.5
362					PGSC0003DMG403027860	Gene of unknown function	238.4
363					PGSC0003DMG400011688	ATS/KAN4 (ABERRANT TESTA SHAPE)	241
364					PGSC0003DMG402027860	Small molecule transporter	244.5
365	Percent chain tuber	PotVar0007753	4	30716340	PGSC0003DMG400005353	Alpha-glucosidase	2.3
366					PGSC0003DMG400042985	Polyprotein	14.4
367					PGSC0003DMG400005352	Protein kinase APK1B, chloroplast	19.3
368					PGSC0003DMG400038290	Gene of unknown function	89.1
369					PGSC0003DMG400005354	Gene of unknown function	89.6
370					PGSC0003DMG400005358	Senescence-associated protein	95.4
371					PGSC0003DMG400005351	MLO1	98.9
372					PGSC0003DMG400045039	Gene of unknown function	117.9
373					PGSC0003DMG400005359	Sinapyl alcohol dehydrogenase 2	154.5
374					PGSC0003DMG400043761	Gene of unknown function	240.7
375					PGSC0003DMG400047138	Gene of unknown function	241.5
376	Percent growth crack	PotVar0087270	4	66211523	PGSC0003DMG400004953	Homeotic protein knotted-1	3.1
377					PGSC0003DMG400004932	Homeobox-leucine zipper protein HAT22	8.7
378					PGSC0003DMG400004954	Xylanase Xyn2	26.7
379					PGSC0003DMG400004955	Xylanase Xyn2	34.1
380					PGSC0003DMG400004952	Branched-chain amino acid aminotransferase	46
381					PGSC0003DMG400004933	Serine esterase family protein	47
382					PGSC0003DMG400004970	Gene of unknown function	53.8
383					PGSC0003DMG400004934	UPA25	56.1
384					PGSC0003DMG400004935	Conserved gene of unknown function	61
385					PGSC0003DMG400004956	Erg28	62.5
386					PGSC0003DMG400004951	Branched-chain-amino-acid aminotransferase	64.2
387					PGSC0003DMG400004957	Conserved gene of unknown function	68.5
388					PGSC0003DMG400004950	Gene of unknown function	71.7
389					PGSC0003DMG400004936	50S ribosomal protein 6, chloroplastic	74.3
390					PGSC0003DMG400004958	Inositol-tetrakisphosphate 1-kinase 2	78.3
391					PGSC0003DMG400004959	Poly(ADP-ribose) polymerase, catalytic region	99
392					PGSC0003DMG400004949	Branched-chain-amino-acid aminotransferase	106.7
393					PGSC0003DMG400004960	Poly(ADP-ribose) polymerase, catalytic region	113.4
394					PGSC0003DMG400042652	Conserved gene of unknown function	123.8
395					PGSC0003DMG400004937	Poly(RC)-binding protein	128.8
396					PGSC0003DMG400004931	Gene of unknown function	129.2
397					PGSC0003DMG400004961	Amino acid transporter	134.8
398					PGSC0003DMG400004948	MYB transcription factor MYB161	140.3
399					PGSC0003DMG400004930	Conserved gene of unknown function	146
400					PGSC0003DMG400004929	YEATS domain-containing protein	159.4
401					PGSC0003DMG400004938	Xylulose kinase	169.6
402					PGSC0003DMG400043403	S-locus-specific glycoprotein S13	175.6
403					PGSC0003DMG400004962	Alpha-tubulin	176.4
404					PGSC0003DMG400004971	Gene of unknown function	183.5
405					PGSC0003DMG400004963	Receptor protein kinase	200.1
406					PGSC0003DMG400004969	Integrase	206
407					PGSC0003DMG400004928	S-locus-specific glycoprotein S13	209.3
408					PGSC0003DMG400004964	Zinc finger protein	213.1
409					PGSC0003DMG400004965	Gene of unknown function	218.4
410					PGSC0003DMG401004946	S-locus-specific glycoprotein S13	229.6
411					PGSC0003DMG400004927	Gene of unknown function	234.7
412					PGSC0003DMG402004946	S-locus-specific glycoprotein S13	240.4
413					PGSC0003DMG400004966	Receptor protein kinase CLAVATA1	240.5
414					PGSC0003DMG400004926	Early-responsive to dehydration protein	246.6
415	Average tuber weight	PotVar0086307	6	12615306	PGSC0003DMG400042143	Integrase core domain containing protein	30.5
416					PGSC0003DMG400044785	Gene of unknown function	33.7
417					PGSC0003DMG400003434	Xyloglucan endotransglucosylase-hydrolase XTH6	38.9
418					PGSC0003DMG400003432	Xyloglucan endotransglucosylase-hydrolase XTH6	44.7
419					PGSC0003DMG400046809	Gene of unknown function	48
420					PGSC0003DMG400046045	Integrase core domain containing protein	119.2
421					PGSC0003DMG400014024	Xyloglucan endotransglucosylase-hydrolase XTH6	128
422					PGSC0003DMG400030263	Nitrate transporter	132.3
423					PGSC0003DMG400014025	Gene of unknown function	150.2
424					PGSC0003DMG400046679	Gene of unknown function	155.1
425					PGSC0003DMG400037500	Mutator-like transposase	157.4
426					PGSC0003DMG400014023	Plasmodium exported protein	160.5
427					PGSC0003DMG400038522	Conserved gene of unknown function	174.1
428					PGSC0003DMG400036031	Xyloglucan endotransglucosylase-hydrolase XTH6	206
429					PGSC0003DMG400041853	Gene of unknown function	236.7
430	Percent knobs	solcap_snp_c2_32923	6	31746535	PGSC0003DMG400029075	CBL-interacting protein kinase 13	0.6
431					PGSC0003DMG400029077	CBL-interacting protein kinase 13	35
432					PGSC0003DMG400029074	Purine permease	55.1
433					PGSC0003DMG400029073	Dual specificity protein phosphatase	86.3
434					PGSC0003DMG400029078	DNA binding protein	100.8
435					PGSC0003DMG400029070	Gene of unknown function	104.8
436					PGSC0003DMG400029079	Conserved gene of unknown function	115.5
437					PGSC0003DMG400043936	Gene of unknown function	136.1
438					PGSC0003DMG400029072	Alpha-soluble NSF attachment protein	139.2
439					PGSC0003DMG400029071	Conserved gene of unknown function	156.1
440					PGSC0003DMG400029080	LOB domain-containing protein	179.4
441					PGSC0003DMG400014055	Peroxidase	226.1
442	Percent growth crack	PotVar0040975	6	55572089	PGSC0003DMG400011997	CPN60A	1
443					PGSC0003DMG400012002	Oxidoreductase	4.2
444					PGSC0003DMG400012001	White-brown-complex ABC transporter family	7.2
445					PGSC0003DMG400012000	ATP binding protein	14.7
446					PGSC0003DMG401011998	High-affinity nitrate transporter	35.9
447					PGSC0003DMG402011998	High-affinity nitrate transporter	44.5
448					PGSC0003DMG400012003	Cell division control protein	53.3
449					PGSC0003DMG400011999	ATP-binding cassette transporter	64.5
450					PGSC0003DMG400012004	Gene of unknown function	73.6
451					PGSC0003DMG402008795	Gene of unknown function	75.8
452					PGSC0003DMG401008795	Gene of unknown function	76.6
453					PGSC0003DMG400008794	Major latex	81.4
454					PGSC0003DMG400007163	Transmembrane protein	85
455					PGSC0003DMG400007162	SAUR family protein	94.9
456					PGSC0003DMG400007141	ABC transporter family protein	103
457					PGSC0003DMG400007140	Metal ion binding protein	107
458					PGSC0003DMG402007138	Conserved gene of unknown function	152.6
459					PGSC0003DMG401007138	Conserved gene of unknown function	157.6
460					PGSC0003DMG400024315	Nectarin-2	161.2
461					PGSC0003DMG400007161	T-complex protein 1 beta subunit (TCP-1-beta)	161.8
462					PGSC0003DMG400007137	Serine carboxypeptidase III	171.7
463					PGSC0003DMG400024321	Mutt/nudix hydrolase	173.8
464					PGSC0003DMG400007136	SNF7 family protein	179.7
465					PGSC0003DMG400007168	Gene of unknown function	189.1
466					PGSC0003DMG400007135	Mucin	192.4
467					PGSC0003DMG400007134	Tonoplast intrinsic protein	198.7
468					PGSC0003DMG400024317	Storage protein	208.6
469					PGSC0003DMG400007133	Conserved gene of unknown function	215.5
470					PGSC0003DMG400024318	Pleckstrin homology (PH) domain-containing protein / lipid-binding START domain-containing protein	220.4
471					PGSC0003DMG400024319	GATA-1 zinc finger protein	227.4
472					PGSC0003DMG400007160	DNA-binding protein	228
473					PGSC0003DMG400024320	Auxin response factor 16	234.6
474					PGSC0003DMG400024322	SIT4 phosphatase-associated family protein	240.7
475					PGSC0003DMG400007159	Histone H2B.1	241.5
476					PGSC0003DMG400007158	Histone H2B	245.2
477					PGSC0003DMG400007132	Ubiquitin-protein ligase	248.1
478	Percent chain tuber	PotVar0086820	8	43123854	PGSC0003DMG400014513	Pentatricopeptide repeat-containing protein	0.5
479					PGSC0003DMG400014498	Ribosomal protein L27	4.9
480					PGSC0003DMG400014497	AP-2 complex subunit beta-1	14.7
481					PGSC0003DMG400041272	Phosphate transporter PHO1 homolog 10	15.5
482					PGSC0003DMG402014514	PERK1 kinase	22.7
483					PGSC0003DMG401014514	Proline-rich receptor kinase PERK1	27.2
484					PGSC0003DMG400014512	GTP binding protein	29.6
485					PGSC0003DMG400014515	Rhomboid family protein	31
486					PGSC0003DMG400014496	Aldehyde dehydrogenase (NAD+)	36.4
487					PGSC0003DMG400014499	Tyramine N-feruloyltransferase 4/11	38.9
488					PGSC0003DMG400014511	ATOFP8/OFP8	50.2
489					PGSC0003DMG400014500	Gene of unknown function	55
490					PGSC0003DMG400014510	Flavin monooxygenase	84
491					PGSC0003DMG400010831	Protein phosphatase 2C	123.6
492					PGSC0003DMG400010843	Cellulose synthase CslE	126.3
493					PGSC0003DMG400014519	Auxin and ethylene responsive GH3	126.8
494					PGSC0003DMG400014509	BURP domain-containing protein	135
495					PGSC0003DMG400010832	Tyramine N-feruloyltransferase 4/11	143.4
496					PGSC0003DMG400010839	Aromatic amino acid decarboxylase 1B	149.1
497					PGSC0003DMG400034395	Gene of unknown function	177.2
498					PGSC0003DMG400010833	Conserved gene of unknown function	178.5
499					PGSC0003DMG400042760	RD22	189
500					PGSC0003DMG400010834	Coiled-coil domain-containing protein	189.1
501					PGSC0003DMG400047074	BURP domain-containing protein	195.6
502					PGSC0003DMG400010835	Serine hydroxymethyltransferase	198.3
503					PGSC0003DMG400010836	Lupus la ribonucleoprotein	208.5
504					PGSC0003DMG400010844	Gene of unknown function	213.7
505					PGSC0003DMG400014494	Helicase and polymerase containing protein TEBICHI	226.9
506					PGSC0003DMG400010840	Aspartate aminotransferase	231
507					PGSC0003DMG400010841	Eukaryotic translation initiation factor 3 subunit 6-interacting protein	240.5
508					PGSC0003DMG400014493	Helicase and polymerase containing protein TEBICHI	243
509					PGSC0003DMG400010842	Conserved gene of unknown function	248.4
510	Average tuber number	solcap_snp_c2_25485	10	48737840	PGSC0003DMG400031239	Gene of unknown function	1.3
511					PGSC0003DMG400031230	Ribosomal protein S6 kinase	1.6
512					PGSC0003DMG400031221	Hydrolase, hydrolyzing O-glycosyl compounds	3.5
513					PGSC0003DMG400031222	Phospholipid-transporting atpase	30.7
514					PGSC0003DMG400031228	LRR receptor-like serine/threonine-protein kinase	31.9
515					PGSC0003DMG400027711	Leucine-rich repeat transmembrane protein kinase	38.1
516					PGSC0003DMG400027710	ATP binding protein	52.6
517					PGSC0003DMG400027703	Alphavirus core protein family	56.1
518					PGSC0003DMG400031231	Conserved gene of unknown function	60.4
519					PGSC0003DMG400027702	KH domain-containing protein	69.7
520					PGSC0003DMG400031223	Lung seven transmembrane receptor family protein	69.8
521					PGSC0003DMG400027701	Conserved gene of unknown function	79.2
522					PGSC0003DMG400031224	Vacuolar sorting receptor protein PV72	79.3
523					PGSC0003DMG400036598	YUP8H12R.2 protein	86.7
524					PGSC0003DMG400031232	GRF domain class transcription factor	90.8
525					PGSC0003DMG400027709	Conserved gene of unknown function	104
526					PGSC0003DMG400031233	F-box protein	107.4
527					PGSC0003DMG400031234	Elongation factor P (EF-P)	111.2
528					PGSC0003DMG400027699	Conserved gene of unknown function	120.8
529					PGSC0003DMG400027698	Conserved gene of unknown function	126.4
530					PGSC0003DMG400027708	Gene of unknown function	136.2
531					PGSC0003DMG400027697	Conserved gene of unknown function	137.5
532					PGSC0003DMG400031235	Protein kinase atsik	140.6
533					PGSC0003DMG400027696	Auxin:hydrogen symporter	144.2
534					PGSC0003DMG400034324	Conserved gene of unknown function	153.5
535					PGSC0003DMG400031226	Ulp1 protease family, C-terminal catalytic domain containing protein	158.4
536					PGSC0003DMG400027707	Gene of unknown function	163.3
537					PGSC0003DMG400031236	Non-specific lipid-transfer protein	166.9
538					PGSC0003DMG400042461	Gene of unknown function	169.2
539					PGSC0003DMG402031237	Non-specific lipid-transfer protein	175.6
540					PGSC0003DMG401031237	Non-specific lipid-transfer protein	181.1
541					PGSC0003DMG400006678	Aspartate aminotransferase	242.5
542	Percent internal heat necrosis	PotVar0005016	10	55841256	PGSC0003DMG401028252	Beta-fructofuranosidase	0.7
543					PGSC0003DMG402028252	Beta-fructofuranosidase	13.1
544					PGSC0003DMG400028162	Ribosomal protein S14	17.9
545					PGSC0003DMG400028161	Valacyclovir hydrolase	23.2
546					PGSC0003DMG400028253	Bipolar kinesin KRP-130	24.3
547					PGSC0003DMG400028251	Interferon-induced GTP-binding protein mx	33.1
548					PGSC0003DMG400028254	SAUR family protein	34.3
549					PGSC0003DMG400044699	Interferon-induced GTP-binding protein mx	36.4
550					PGSC0003DMG400028250	OJ000126_13.10 protein	39.8
551					PGSC0003DMG400028249	UPF0497 membrane protein	43.6
552					PGSC0003DMG400028163	Conserved gene of unknown function	44
553					PGSC0003DMG400028248	RNA binding protein	46.6
554					PGSC0003DMG400028160	F-box protein	50.4
555					PGSC0003DMG400028247	EMB2735	56
556					PGSC0003DMG400028164	Transcription factor	58.8
557					PGSC0003DMG400028159	Transcription factor	60.9
558					PGSC0003DMG400028255	Soul heme-binding family protein	74.5
559					PGSC0003DMG400028246	Pre-mRNA splicing factor	78.4
560					PGSC0003DMG400028158	Conserved gene of unknown function	83.8
561					PGSC0003DMG400028165	Calmodulin binding protein	90.8
562					PGSC0003DMG400028166	DNA binding protein	97.1
563					PGSC0003DMG400028245	Short-chain dehydrogenase/reductase 2	97.2
564					PGSC0003DMG400028244	Short chain alcohol dehydrogenase	101.4
565					PGSC0003DMG400028167	Stress-associated protein 9	104.6
566					PGSC0003DMG400028243	40S ribosomal protein S17	105.6
567					PGSC0003DMG400028257	HECT	111
568					PGSC0003DMG400028258	F-box/LRR-repeat protein	114.7
569					PGSC0003DMG402028242	Retinoblastoma-binding protein	122.7
570					PGSC0003DMG401028242	Conserved gene of unknown function	140.1
571					PGSC0003DMG400028169	Serine/threonine protein kinase	144.5
572					PGSC0003DMG400028259	GRF domain class transcription factor	151.7
573					PGSC0003DMG400028241	Ubiquitin-conjugating enzyme family protein	152.4
574					PGSC0003DMG400028156	F-box family protein	157.4
575					PGSC0003DMG400028240	Dihydrodipicolinate synthase, chloroplastic	161.4
576					PGSC0003DMG400040827	Plant-specific domain TIGR01568 family protein	169.2
577					PGSC0003DMG400028170	Conserved gene of unknown function	169.8
578					PGSC0003DMG400045504	Conserved gene of unknown function	173.1
579					PGSC0003DMG400043673	Conserved gene of unknown function	176.4
580					PGSC0003DMG400028260	Conserved gene of unknown function	179.2
581					PGSC0003DMG400047128	Chloroplast threonine deaminase 1	187.1
582					PGSC0003DMG400028155	Conserved gene of unknown function	189.5
583					PGSC0003DMG400044115	Gene of unknown function	190.1
584					PGSC0003DMG400028171	Glutamate-ammonia ligase	193.9
585					PGSC0003DMG400028239	HVA22 i	194.2
586					PGSC0003DMG400028238	Thioredoxin peroxidase	198.3
587					PGSC0003DMG400045042	Dehydration-responsive element-binding protein 1B	202
588					PGSC0003DMG400028154	Cytokinin riboside 5'-monophosphate phosphoribohydrolase LOG7	203.4
589					PGSC0003DMG400028237	S locus F-box (SLF)-S5 protein	215.2
590					PGSC0003DMG400028172	Transcription factor	223
591					PGSC0003DMG400028236	Conserved gene of unknown function	224.6
592					PGSC0003DMG400028261	Fructose-bisphosphate aldolase	229.7
593					PGSC0003DMG400028153	Hin1	236.6
594					PGSC0003DMG400028173	Phytosulfokine peptide	237.3
595					PGSC0003DMG400028152	Hin1	242.2
596					PGSC0003DMG400028235	Hin1	245.6
597	Percent hollow heart	solcap_snp_c2_3726	11	40187661	PGSC0003DMG401007414	Esterase/lipase superfamily protein	0.7
598					PGSC0003DMG402007414	Esterase/lipase/thioesterase family protein	2.9
599					PGSC0003DMG400007413	Acetyltranferase	5.9
600					PGSC0003DMG400007401	MYB-CC type transfactor	9.4
601					PGSC0003DMG400007402	Poly [ADP-ribose] polymerase	19.4
602					PGSC0003DMG401007403	Vacuolar protein sorting-associated protein VPS4	26.9
603					PGSC0003DMG403007403	Vacuolar protein sorting-associated protein VPS4	32.1
604					PGSC0003DMG400007400	Acyltransferase	35.1
605					PGSC0003DMG402007403	Vacuolar protein sorting-associated protein VPS4	37.1
606					PGSC0003DMG400007415	Pentatricopeptide repeat-containing protein	41.3
607					PGSC0003DMG400007412	ABC transporter B family member 21	43
608					PGSC0003DMG400007404	Protein HIRA	49.2
609					PGSC0003DMG400007399	P-glycoprotein 21	56.9
610					PGSC0003DMG400007405	Acyl CoA reductase	73.7
611					PGSC0003DMG400007411	Acyl-transferase	74.3
612					PGSC0003DMG401007406	Fatty acyl-CoA reductase 1	103.3
613					PGSC0003DMG402007406	Male sterility protein	119
614					PGSC0003DMG403007406	Male sterility protein	130
615					PGSC0003DMG401026367	Acyl-transferase	135.3
616					PGSC0003DMG400039919	Flavonol 3-sulfotransferase	138.4
617					PGSC0003DMG400026366	Acyltransferase	141.9
618					PGSC0003DMG400026365	Gene of unknown function	148.6
619					PGSC0003DMG400039544	Gene of unknown function	157
620					PGSC0003DMG400026364	BZip protein AtbZip21	162.2
621					PGSC0003DMG400044576	Type I MADS box transcription factor	162.3
622					PGSC0003DMG400007416	Gene of unknown function	167.4
623					PGSC0003DMG400026363	Conserved gene of unknown function	170.1
624					PGSC0003DMG400026362	Conserved gene of unknown function	172.2
625					PGSC0003DMG400007408	Aldo-keto reductase	174.7
626					PGSC0003DMG400026342	Cytochrome b-c1 complex subunit 9	178.9
627					PGSC0003DMG400007409	Conserved gene of unknown function	183.9
628					PGSC0003DMG400026361	Ribosomal protein	186.2
629					PGSC0003DMG400026360	Ferredoxin-3, chloroplast	191.7
630					PGSC0003DMG400026359	Glucan endo-1,3-beta-glucosidase	210.3
631					PGSC0003DMG400026358	Conserved gene of unknown function	215.9
632					PGSC0003DMG400026341	Ef-hand calcium binding protein	219.5
633					PGSC0003DMG400026340	Tetratricopeptide-like helical	224.3
634					PGSC0003DMG400007410	60s acidic ribosomal protein	230.1
635					PGSC0003DMG400026357	DNA polymerase epsilon P17 subunit	230.5
636					PGSC0003DMG400026339	Conserved gene of unknown function	234.6
637					PGSC0003DMG400007418	WD-repeat protein	235.9
638					PGSC0003DMG400026338	Sec23/sec24 transport family protein	242.4
639	Percent growth crack	solcap_snp_c1_15802	11	42956372	PGSC0003DMG400018703	Glycosyl hydrolases family 17 protein	2.7
640					PGSC0003DMG400018704	Glycosyl hydrolases family 17 protein	7.8
641					PGSC0003DMG400018702	I-box binding factor	8.3
642					PGSC0003DMG400018715	Ribosomal protein L7/L12 C-terminal domain containing protein	10.7
643					PGSC0003DMG401018705	Conserved gene of unknown function	15.3
644					PGSC0003DMG400018724	Gene of unknown function	16.8
645					PGSC0003DMG402018705	Gene of unknown function	18.1
646					PGSC0003DMG400018716	3-methyl-2-oxobutanoate hydroxymethyltransferase	19.8
647					PGSC0003DMG400018701	Ribosomal protein L30e	20.1
648					PGSC0003DMG400018706	Amidase family protein	28
649					PGSC0003DMG400018717	Hsp20/alpha crystallin family protein	30.3
650					PGSC0003DMG400040270	Gene of unknown function	32.7
651					PGSC0003DMG400018718	Gene of unknown function	36.4
652					PGSC0003DMG400018700	Anthranilate N-benzoyltransferase protein	48.9
653					PGSC0003DMG402018708	Aldehyde oxidase	63.9
654					PGSC0003DMG400018712	Carbonyl reductase	70.9
655					PGSC0003DMG401018708	Aldehyde oxidase	74.8
656					PGSC0003DMG400018699	Anthranilate N-benzoyltransferase protein	77.3
657					PGSC0003DMG400018714	Gene of unknown function	88
658					PGSC0003DMG400018713	Carbonyl reductase	96.2
659					PGSC0003DMG400018698	Gene of unknown function	101.3
660					PGSC0003DMG403018696	Disease resistance protein I2C-5	103.9
661					PGSC0003DMG402018696	Disease resistance protein I2	104.6
662					PGSC0003DMG401018696	Disease resistance protein R3a	106.2
663					PGSC0003DMG400041461	Late blight resistance protein	108.7
664					PGSC0003DMG400018711	Carbonyl reductase	115.6
665					PGSC0003DMG400018695	Homoserine dehydrogenase family protein	117.4
666					PGSC0003DMG400018694	Disease resistance protein R3a	120.6
667					PGSC0003DMG400018723	Gene of unknown function	130.5
668					PGSC0003DMG400039122	Two-component response regulator ARR22	135.6
669					PGSC0003DMG400046048	Conserved gene of unknown function	138.2
670					PGSC0003DMG400018722	Disease resistance protein I2C-5	147.5
671					PGSC0003DMG400018720	Potato resistance I2GA-SH23-3	152.8
672					PGSC0003DMG400018692	Actin	160.2
673					PGSC0003DMG400035602	Sensory transduction histidine kinase bacterial	161.5
674					PGSC0003DMG400018710	GG25239	169
675					PGSC0003DMG400003013	Beta-D-glucan exohydrolase	170.9
676					PGSC0003DMG400003012	Hydrolase, hydrolyzing O-glycosyl compounds	179.2
677					PGSC0003DMG400018693	Disease resistance protein I2	180.8
678					PGSC0003DMG400046756	ATP binding protein	186.1
679					PGSC0003DMG400018719	Late blight resistance protein	190.3
680					PGSC0003DMG400003011	Pentatricopeptide repeat-containing protein	193.8
681					PGSC0003DMG400018577	Disease resistance protein I2C-5	197.7
682					PGSC0003DMG400002996	Tousled	198.1
683					PGSC0003DMG402018576	Potato late blight resistance protein R3a	202.6
684					PGSC0003DMG401018576	Disease resistance protein I2C-5	207.7
685					PGSC0003DMG400018591	Carbonyl reductase	215
686					PGSC0003DMG400018575	Homoserine dehydrogenase family protein	217.1
687					PGSC0003DMG400002995	Cellular nucleic acid binding protein	219.9
688					PGSC0003DMG400018574	Disease resistance protein R3a	220
689					PGSC0003DMG400018573	Disease resistance protein R3a	222
690					PGSC0003DMG400018572	Disease resistance protein I2C-5	225.5
691					PGSC0003DMG402003010	Ubiquitin carboxyl-terminal hydrolase	236.5
692					PGSC0003DMG400018570	Disease resistance protein R3a	238.4
693	Percent internal heat necrosis	solcap_snp_c2_19466	11	13771649	PGSC0003DMG400009276	Transcription factor	0.4
694					PGSC0003DMG400009275	Gene of unknown function	24.8
695					PGSC0003DMG400009277	SLL1 protein	33.2
696					PGSC0003DMG402009259	Conserved gene of unknown function	40
697					PGSC0003DMG400009287	MuDR family transposase containing protein	41.7
698					PGSC0003DMG400009274	Gene of unknown function	62.7
699					PGSC0003DMG400009273	Acyltransferase 2	80.2
700					PGSC0003DMG400035247	Mads box protein	84.5
701					PGSC0003DMG400009258	Zinc finger containing preotein	86.6
702					PGSC0003DMG400009257	Neutral/alkaline invertase	91.9
703					PGSC0003DMG400040631	Gene of unknown function	122.7
704					PGSC0003DMG400009278	DCK/dGK-like deoxyribonucleoside kinase	129
705					PGSC0003DMG400042493	Gene of unknown function	139.8
706					PGSC0003DMG400034588	Gene of unknown function	182.1
707					PGSC0003DMG400009272	TIR-NBS disease resistance	197.3
708					PGSC0003DMG400041112	Gene of unknown function	206.4
709					PGSC0003DMG400009256	Peptide chain release factor	213.1
710					PGSC0003DMG400035924	Gene of unknown function	215.2
711					PGSC0003DMG400009279	Ribosomal RNA methyltransferase	244.3

## Sheet: Table S4
Table S4|Genomic- estimated breeding values (GEBVs) of 217 potato clones for yield and tuber defect traits.
S.N	Clone	Total yield	Yield without culls	Culls yield	Average tuber weight	Tuber number per plant	Percent tubers with heat sprouts	Percent tubers with knobs	Percent tubers with chain tubers	Percent tubers with growth cracks	Percent tubers with external defects	Percent tubers with hollow heart	Percent tubers with vascular discoloration	Percent tubers with internal heat necrosis	Percent tubers with Internal defects
8	AOR07781-2	43.15	38.81	2.88	128.63	6.89	0.16	5.33	0.11	0.33	5.28	1.07	2.43	0.68	3.29
9	AORTX09037-1W/Y	35.91	33.59	2.35	103.27	7.96	0.4	3.69	0.11	0.79	4.58	-0.06	3.61	0.56	4.17
10	AOTX02136-1Ru	28.37	26.43	2.23	134.5	4.7	0.28	3.31	0.11	1.66	5.38	1.27	2.21	0.69	3.96
11	AOTX03187-1Ru	31.81	29.54	2.11	76.44	9.2	0.36	2.59	0.11	0.52	3.9	0.67	2.41	0.56	3.5
12	AOTX05043-1Ru	24.66	23.41	1.82	105.04	4.54	0.35	2.61	0.11	0.8	3.81	0.92	2.49	0.54	2.85
13	AOTX91861-4R	40.9	38.77	1.99	103.33	8.54	0.38	1.55	0.11	0.93	2.36	1.46	3.54	0.42	7.03
14	AOTX93483-1R	33.26	31.65	1.5	92.15	8.59	0.27	1.58	0.11	1.1	2.79	1.13	3.36	0.38	5.71
1	AOTX95265-1Ru	29.5	27.49	1.56	128.57	4.48	0.21	2.5	0.11	0.26	2.7	1.42	2.53	0.41	4.54
2	AOTX95265-2ARu	29.44	28.52	1.48	114.16	4.87	0.25	1.54	0.11	0.16	1.82	1.39	3.17	0.68	6.35
15	AOTX95265-2Ru	28.55	26.63	1.66	127.36	4.61	0.22	2.62	0.11	0.29	2.82	1.46	2.54	0.41	4.54
3	AOTX95265-3Ru	29.53	27.51	1.57	128.89	4.47	0.21	2.52	0.11	0.26	2.71	1.42	2.53	0.41	4.54
4	AOTX95265-4Ru	29.56	27.51	1.6	129.26	4.43	0.22	2.58	0.11	0.28	2.84	1.46	2.49	0.4	4.48
16	AOTX95295-3Ru	29.59	27.55	1.58	129.18	4.45	0.21	2.53	0.11	0.26	2.74	1.42	2.53	0.41	4.53
17	AOTX95309-1W	32.91	31.89	1.76	129.47	5.83	0.8	2.24	0.11	0.37	2.76	1.47	3.12	0.62	4.96
18	AOTX95309-2W*	32.16	30.5	1.91	91.44	7.82	0.24	2.86	0.11	0.39	3.26	0.73	3.66	0.83	5.4
19	AOTX96075-1Ru	29.56	27.52	1.58	128.97	4.48	0.21	2.54	0.11	0.26	2.74	1.43	2.53	0.41	4.54
20	AOTX96084-1Ru	28.72	26.77	1.65	123.75	4.67	0.23	2.59	0.11	0.27	2.77	1.41	2.54	0.42	4.53
21	AOTX96208-1Ru	29.2	27.25	1.57	126.05	4.61	0.22	2.44	0.11	0.24	2.63	1.37	2.57	0.41	4.63
22	AOTX96216-1Ru	34.94	29.92	4.42	175.62	4.14	0.48	4.38	0.11	2.78	7.38	1.02	2.77	0.63	4.06
23	AOTX96216-2Ru	34.44	29.6	4.3	175.32	4.18	0.48	4.44	0.11	2.73	7.36	1	2.75	0.63	4.04
24	AOTX97213-1Ru	31.45	28.56	2.26	113.47	5.51	0.27	4.27	0.11	0.81	5.69	2.39	2.58	0.51	6.2
25	AOTX98096-1Ru*	29.57	27.54	1.57	128.78	4.48	0.21	2.53	0.11	0.25	2.73	1.42	2.53	0.41	4.55
26	AOTX98137-1Ru	29.57	27.53	1.57	129.16	4.46	0.21	2.53	0.11	0.26	2.73	1.42	2.53	0.41	4.54
27	AOTX98152-3Ru	45.48	41.35	3.27	154.99	6.68	0.34	2.62	0.11	1.39	4.63	6.39	2.55	0.93	10.56
28	AOTX98202-1Ru	33.29	30.58	2.34	118.57	5.8	0.31	4.91	0.11	0.4	5.03	1.03	2.92	0.53	5.4
29	Atlantic	36.89	35.22	2.16	115.09	6.91	0.46	1.98	0.11	0.95	3.5	2.83	3.92	1.37	10.58
30	ATTX00289-4W	39.1	36.32	2.64	111.92	7.39	0.52	2.92	0.11	0.49	4.11	0.79	3.72	0.56	6.65
31	ATTX00289-5R/Y	41.25	38.2	2.25	98.1	9.33	0.36	1.91	0.11	0.75	2.9	0.33	3.23	0.36	2.43
32	ATTX00289-6Y/Y	35.44	33.35	2.27	104.31	7.59	0.45	3.31	0.11	0.61	4.14	5.01	3.33	0.68	11.37
33	ATTX01178-1R	35.67	34.23	1.46	97.26	8.23	0.25	1.26	0.11	1.01	2.09	1.29	2.88	0.34	4.25
34	ATTX01180-1R/Y	32.46	29.66	2.15	80.64	9.55	0.28	2.18	0.11	1.01	3.1	1.11	4.09	0.39	4.61
35	ATTX03516-2R	34.68	32.82	1.63	91.3	8.16	0.23	1.91	0.11	0.76	2.74	1.54	3.42	0.43	5.68
36	ATTX05175s-1R/Y	25.69	24.55	1.35	49.48	11.27	0.33	2.1	0.11	0.23	2.62	0.44	3.37	0.47	4.68
37	ATTX05186-2R	28.71	27.13	1.76	52.27	11.22	0.38	2.15	0.11	0.44	3.57	0.76	4.31	0.48	10.43
38	ATTX06246-1R	30.27	28.2	1.89	61.32	11.96	0.32	2.18	0.11	1.07	3.39	1.74	2.95	0.27	3.7
39	ATTX07042-3W	28.31	26.47	2.16	99.57	6.68	0.35	2.2	0.11	1.67	4.65	1.24	3.1	0.64	4.53
40	ATTX10265-4R/Y	29.3	25.96	3.18	69.37	9.42	0.38	5.37	0.11	0.7	7.01	0.22	2.85	0.42	2.26
41	ATTX88481-1P/W	32.82	31.72	1.54	110.39	7.01	0.32	1.39	0.11	1.27	2.91	1.13	2.77	0.35	3.92
42	ATTX88654-2P/Y	29.97	27.48	2.18	80.82	8	0.28	2.88	0.11	0.6	3.92	0.82	3.07	0.42	3.96
43	ATTX95490-2W	45.33	37.59	5.23	104.76	9.04	0.84	5.04	0.11	0.7	7.09	1.02	4.75	0.39	6.28
44	ATTX961014-1AR/Y	32.28	30.57	1.88	93.16	7.76	0.25	2.73	0.11	0.39	3.16	0.87	3.68	0.86	5.84
45	ATTX961014-1Br/Y	32.09	30.45	1.9	91.35	7.78	0.24	2.84	0.11	0.4	3.26	0.71	3.66	0.83	5.4
47	ATTX961014-1R/Y Chimera	33.69	32.04	1.65	78.23	8.88	0.28	1.49	0.11	0.75	2.12	1.24	2.68	0.37	3.37
84	ATTX96746-1R*	27.82	25.61	2.25	79.69	7.59	0.45	4.43	0.11	0.8	5.11	0.94	2.91	0.42	3.03
48	ATTX98444s-16R/Y	24.68	23.19	1.55	53.05	8.89	0.3	2.94	0.11	0.61	3.7	0.57	2.81	0.34	2.69
49	ATTX98448-6R/Y	41.3	38.25	2.24	98.45	9.32	0.36	1.93	0.11	0.74	2.91	0.31	3.22	0.37	2.42
50	ATTX98453-11Br	29.81	28.58	1.59	71.82	10.43	0.28	1.38	0.11	1.15	2.6	0.42	2.9	0.3	2.27
51	ATTX98453-3R	36.79	34.98	1.74	79.35	10.27	0.25	1.52	0.11	1.18	2.76	0.97	3.26	0.4	5.59
52	ATTX98453-6R	33.51	32.09	1.48	97.62	7.8	0.25	1.39	0.11	0.99	2.4	0.59	2.78	0.31	2.66
53	ATTX98462s-3R/Y	32.21	30.55	1.91	91.84	7.79	0.24	2.84	0.11	0.4	3.25	0.72	3.66	0.82	5.4
54	ATTX98465-1R/Y	37.46	34.24	2.56	74.47	11.16	0.33	1.82	0.11	1.12	3.83	1.2	4	0.47	7.89
55	ATTX98466-5R/WR	33.7	32.1	1.64	78.09	8.9	0.28	1.48	0.11	0.74	2.09	1.25	2.69	0.37	3.42
56	ATTX98468-5Ru/Y*	25.78	23.56	2.16	112.05	4.66	0.27	4.42	0.11	0.5	5.07	2.06	2.56	0.53	5.86
57	ATTX98491-4Yrdspl/Y	28.34	26.95	1.57	64.02	8.86	0.23	1.64	0.11	0.75	2.51	0.41	3.26	0.39	3.87
58	ATTX98493-1AR	31.9	30.06	1.48	73.13	9.05	0.23	2.06	0.11	0.44	2.18	0.91	2.95	0.41	2.97
59	ATTX98493-2P/P	28.98	26.05	2.72	72.89	8.32	0.43	5.43	0.11	0.38	6.71	0.1	2.43	0.43	0.54
60	ATTX98500-2P/Y	28.59	26.16	2.18	69.73	8.39	0.36	3.71	0.11	0.41	4.55	0.48	2.92	0.48	2.67
61	ATTX98500-3P/Y	21.44	19.2	2.45	65.52	7.22	0.37	5.64	0.11	0.54	6.85	0.47	2.89	0.48	3.3
62	ATTX98510-1R/Y	31.71	30.06	1.44	73.74	8.75	0.31	1.42	0.11	0.72	2.23	1.01	3.41	0.43	5.06
63	ATTX98514-1R/Y	21.58	20.26	1.69	75.2	5.82	0.37	2.4	0.11	0.32	2.89	0.96	3.35	0.58	5.57
64	ATTX98518-5P/Y	31.98	29.24	2.05	108.61	6.52	0.35	2.67	0.11	0.71	3.29	2.79	3.1	0.42	4.1
65	ATTX99325-1P	32.8	31.72	1.52	110.09	6.88	0.31	1.41	0.11	1.24	2.86	1.09	2.78	0.36	3.96
66	ATX02263-1R/Y	26.44	25.62	1.41	61.68	8.46	0.26	1.7	0.11	0.6	2.27	0.53	2.93	0.37	2.47
67	ATX03496-3Y/Y	34.95	31.37	2.92	79.06	8.89	0.47	4.61	0.11	0.22	5.91	1.2	2.75	0.5	4.55
68	ATX03564-1Y/Y	35.02	31.4	2.93	78.82	8.94	0.47	4.62	0.11	0.23	5.95	1.22	2.75	0.5	4.54
69	ATX05186-1R	29.16	27.6	1.73	51.84	11.53	0.38	2.1	0.11	0.44	3.59	0.76	4.26	0.48	10.38
70	ATX05202s-3W/Y	32.39	30.43	2.13	65.77	10.35	0.51	2.34	0.11	0.63	4.59	0.51	4.06	0.66	8.92
71	ATX06264s-4R/Y	28.87	27.15	1.93	80.23	9.26	0.34	2.87	0.11	0.78	3.88	0.83	3.27	0.54	5.23
72	ATX07305S-1Y/Y	27.26	25.3	2.29	50.62	10.83	0.51	3.28	0.11	0.44	5.3	2.17	4.01	0.7	9.3
73	ATX08181-5Y/Y	28.84	26.31	2.48	44.01	14.31	0.49	3.36	0.11	0.13	4.77	1.22	4.52	0.53	10.17
74	ATX84378-6Ru	36.57	31.38	4.37	187.03	4.05	0.53	4.05	0.11	2.88	7.52	1.22	2.76	0.68	4.3
75	ATX84706-2Ru	43.93	38.7	3.65	203.5	4.55	0.34	2.26	0.11	2.47	5.47	6.8	2.73	0.76	11.15
76	ATX85404-8W	32.93	31.92	1.77	129.96	5.81	0.8	2.27	0.11	0.36	2.77	1.47	3.12	0.62	4.98
77	ATX87184-2Ru	29.12	27.41	2.09	153.25	3.91	0.4	2.52	0.11	0.67	3.98	1.1	3.1	0.66	5.28
79	ATX9117-1Ru	29.86	27.64	2.04	138.77	4.32	0.38	2.29	0.11	1.57	4.43	1.14	2.96	0.63	5.16
5	ATX9130-1Ru	32.43	28.49	3.02	143.51	4.5	0.33	4.76	0.11	1.97	7.36	1.4	2.52	0.54	4.1
80	ATX91322-2Y/Y	14.04	13.14	1.69	20.58	10.88	0.32	2.13	0.11	0.3	2.89	0.26	3.33	0.37	4.87
81	ATX9202-3Ru	29.48	27.37	1.66	105.21	5.73	0.25	3.28	0.11	0.15	3.41	0.58	3.06	0.62	5.42
82	ATX9312-1Ru	26.81	24.47	2.09	114.64	4.86	0.27	5.22	0.11	0.45	5.91	0.8	2.27	0.46	2.66
83	ATX9332-8Ru	29.03	25.17	2.11	128.42	4.54	0.2	4.03	0.11	0.59	4.52	0.68	2.36	0.52	2.88
85	ATX97147-4Ru	27.94	24.81	3.03	113.85	4.73	0.47	5.34	0.11	1.13	8.97	2.3	3.03	0.51	7.3
86	ATX99013-1Ru	29.6	27.56	1.58	129.17	4.47	0.21	2.53	0.11	0.26	2.73	1.42	2.53	0.41	4.54
87	BTX1544-2W/Y	34.57	32.07	2.16	94.27	7.4	0.33	3.01	0.11	0.59	3.88	1.89	2.76	0.54	5.42
88	BTX1749-1W/Y	35.35	33.06	2.14	81.15	9.11	0.4	2.47	0.11	0.74	3.48	1.94	3.41	0.66	7.43
89	BTX2103-1R/Y	31.54	30.31	1.41	70.15	9.13	0.3	1.2	0.11	0.61	1.99	1.61	3.31	0.38	4.26
90	BTX2332-1R	33.71	32.43	1.54	97.82	7.21	0.34	1.77	0.11	0.58	2.65	1.14	3.2	0.57	5.47
91	CO112-F2-2P/P	17.43	16.59	1.7	36.47	9.4	0.48	2.6	0.11	0.24	3.52	0.73	2.57	0.66	2.89
92	COTX00104-6R	26.28	25.42	1.57	98.44	6.66	0.26	1.52	0.11	1.11	2.87	1.27	2.93	0.46	4.7
93	COTX00104-7R	30.27	27.95	2.29	96.69	7.18	0.29	1.8	0.11	1.66	4.35	0.11	3.06	0.48	4.2
94	COTX01403-4R/Y	32.1	29.8	1.96	90.09	8.18	0.39	0.98	0.11	2.46	4.03	0.7	2.87	0.31	2.25
95	COTX02172-1R	30.11	28.04	1.81	77.87	8.03	0.24	1.67	0.11	1.08	2.99	0.32	2.87	0.41	2.85
96	COTX02293-4R	27.25	26.17	1.57	76.42	7.83	0.21	1.73	0.11	1.48	3.45	0.44	2.28	0.4	1.91
97	COTX03079-1W/W	36.69	33.32	2.9	77.23	9.75	0.68	3.06	0.11	1.04	5.99	1.53	2.63	0.43	3.92
98	COTX03134-1Y/W	26.03	23.84	2.32	57.57	8.2	0.38	5.22	0.11	0.5	5.66	0.51	2.85	0.6	2.96
99	COTX03187-1W	32	29.68	2.12	77.19	9.11	0.35	2.65	0.11	0.51	3.94	0.68	2.38	0.56	3.39
100	COTX04015-3W/Y	29.81	27.29	2.37	73.62	8.23	0.44	4.26	0.11	0.51	5.03	0.96	4.01	0.56	8.71
101	COTX04050s-1P/P	29.43	26.05	3.49	63.27	9.46	0.45	6.85	0.11	0.44	8.36	0.63	2.73	0.45	1.98
102	COTX04193s-2R/Y	27.11	26.18	1.44	61.14	8.75	0.29	1	0.11	0.78	2.2	0.99	3.24	0.45	4.85
103	COTX04303-3Ru/Y*	29.57	27.54	1.58	129.06	4.47	0.21	2.53	0.11	0.25	2.73	1.41	2.53	0.41	4.54
104	COTX05095-2Ru/Y	33.66	31.98	1.83	100.8	6.7	0.29	3.32	0.11	0.35	3.83	0.83	2.62	0.46	3.7
105	COTX05211-4R	28.68	26.83	2.08	63.83	10.59	0.24	2.89	0.11	1.2	3.91	0.75	2.71	0.3	2.72
106	COTX05211-5R	28.67	26.82	2.08	63.83	10.57	0.24	2.92	0.11	1.19	3.92	0.75	2.71	0.3	2.71
107	COTX05211-7R	34.35	32.37	1.97	70.23	10.44	0.26	1.71	0.11	1.15	3.21	0.73	3.01	0.35	4.18
108	COTX05249-3W/Y	29.14	27.79	1.52	57.11	10.61	0.37	1.52	0.11	0.48	2.56	1.06	3.23	0.5	5.59
109	COTX05261-1R/Y	27.9	26.79	1.66	75.97	8.9	0.24	2.22	0.11	0.83	2.73	1.87	2.6	0.34	2.66
110	COTX08039-1P/P*	26.15	25.14	1.32	73.78	7.08	0.3	1.36	0.11	0.72	1.99	0.94	2.77	0.41	2.86
111	COTX08063-2Ru	30.83	28.66	2	113.44	5.56	0.39	2.4	0.11	0.56	3.6	2.74	2.97	0.42	5.48
112	COTX08121-1Ru	28.57	26.85	1.97	119.75	5.27	0.35	4.58	0.11	0.36	5.53	0.99	2.91	0.51	4.69
113	COTX08121-4Ru	30.14	27.85	2.38	104.04	6.21	0.29	4.12	0.11	0.5	4.8	2.11	3.2	0.62	6.51
114	COTX08258-6Ru	42.07	37.83	3.27	106.74	8.45	0.34	4.31	0.11	1.08	6.17	1.28	3.37	0.62	6.12
115	COTX08322-10Ru	36.75	34.83	2.28	140.26	5.69	0.4	2.56	0.11	0.43	3.52	0.93	3.19	0.53	5.98
116	COTX08365F-3P/P	22.95	20.24	2.71	65.01	6.93	0.41	6.87	0.11	0.62	8.13	1.12	2.14	0.31	1.9
117	COTX09022-3RuRE/Y	39.6	36.72	2.54	106.64	8.08	0.4	2.86	0.11	1.2	4.73	2.53	3.36	0.6	6.99
118	COTX09052-1Ru	30.42	28.63	1.84	94.59	6.26	0.34	3.02	0.11	0.59	4.08	0.62	3.13	0.63	4.6
119	COTX09052-2Ru	30.51	28.72	1.84	94.76	6.27	0.34	2.99	0.11	0.59	4.06	0.62	3.13	0.63	4.61
120	COTX09089-1Ru	31.64	28.37	3.28	105.2	5.71	0.33	1.81	0.11	3.53	7.17	4.44	3.16	0.86	7.71
121	COTX10012-1Wrdspl/Y	34.57	32	2.42	93.28	7.27	0.44	3.36	0.11	0.5	4.59	2.62	3.19	0.51	6.63
122	COTX10073s-1W	32.03	30.04	1.96	90.58	7.8	0.34	2.62	0.11	0.56	3.45	1.71	3.12	0.58	5.42
123	COTX10080-2Ru	30.86	28.89	1.86	106.66	5.79	0.29	1.97	0.11	0.9	3.45	1.14	3.17	1.18	6.46
124	COTX10118-1Wre/Y	29.95	27.46	1.77	62.03	10.01	0.36	2.22	0.11	0.39	3.31	1.29	2.93	0.45	4.05
125	COTX10118-4Wpe/Y	32.27	28.17	2.03	66.21	10.42	0.35	2.64	0.11	0.68	3.52	0.53	2.98	0.45	3.3
126	COTX10138-15Wpe/Y	32.66	31.06	1.4	66.17	10.21	0.23	1.79	0.11	0.74	2.43	0.9	3.66	0.48	6.98
6	COTX10138-19P/Y	32.39	28.33	3.18	101.08	7.37	0.4	5.05	0.11	0.63	6.48	0.35	3.21	0.47	4.08
127	COTX10138s-7Wpe/Y	33.6	31	2.1	74.84	9.98	0.27	2.63	0.11	0.85	3.42	1.03	3.59	0.47	5.76
128	COTX10226-1Wpe/Y	24.46	22.81	1.76	48.55	9.68	0.37	2.28	0.11	0.55	3.38	0.52	2.98	0.52	3.34
129	COTX13215-2Ru	33.7	31.75	1.78	117.96	6.07	0.28	2.14	0.11	0.88	3.33	1.12	3.21	0.59	5.35
130	COTX87601-2Ru	35.96	33.03	2.25	142.17	5.17	0.33	2.21	0.11	0.95	3.11	1.16	2.58	0.73	5.29
131	COTX89044-1Ru	28.19	25.12	2.79	114.69	4.8	0.27	10.74	0.11	0.83	10.6	1.76	2.78	0.37	4.93
132	COTX90046-1W	33.72	32.24	2.01	103.88	6.78	0.37	1.94	0.11	1.52	3.54	1.41	4.99	0.79	6.78
133	COTX90046-5W	34.39	32.69	1.94	124.41	5.68	0.32	2.04	0.11	1.49	3.67	1.26	4.53	0.74	7.05
134	COTX94216-1R	33.15	31.27	1.79	78.87	9.5	0.3	2.11	0.11	0.65	2.92	1	3.05	0.54	4.52
135	COTX94218-1R	33.29	32.28	1.25	71.09	9.81	0.28	1.07	0.11	0.74	1.88	0.39	2.55	0.36	1.46
136	JTTX75/2003EH-1Yre/Y	25.1	24.03	1.38	82.39	7.28	0.25	2.1	0.11	0.48	2.67	0.67	3.15	0.46	4.75
137	Krantz	35.07	31.93	2.7	137.85	5.49	0.46	3.75	0.11	0.89	4.67	0.93	2.97	0.56	4.03
138	MWTX2609-2Ru	39.72	34.62	4.54	138.81	5.91	0.48	6.81	0.11	0.5	7.51	0.81	2.69	0.57	4.43
139	MWTX2609-4Ru	39.76	34.63	4.55	138.8	5.91	0.48	6.84	0.11	0.5	7.52	0.82	2.7	0.57	4.43
140	MWTX548-2Ru	39.65	34.59	4.51	137.83	5.94	0.48	6.75	0.11	0.48	7.46	0.81	2.7	0.57	4.44
141	NDTX050169-1R	21.23	20.96	1.08	45.53	10.21	0.21	0.82	0.11	0.96	1.99	0.24	2.66	0.25	1.23
142	NDTX050184s-1R/Y	26.04	24.9	1.51	67.64	8.73	0.27	2.03	0.11	0.7	2.96	0.22	2.92	0.35	2.83
143	NDTX059759-3R/Y Pinto	25.91	24.79	1.46	70.93	6.78	0.34	1.26	0.11	0.67	2.17	0.54	3.18	0.52	4.14
144	NDTX059761-1R/R	25.23	23.45	1.86	55.66	9.25	0.44	2.34	0.11	0.73	3.92	0.16	2.48	0.45	1.33
145	NDTX059775-1W	31.01	27.95	2.82	62.75	10.49	0.49	4.89	0.11	0.4	6.29	0.02	2.53	0.37	1.44
146	NDTX059828-2W	26.7	26.01	1.32	66.39	8.36	0.25	1.37	0.11	0.77	2.14	0.11	2.46	0.35	0.89
147	NDTX059886S-1Y/Y	32.31	30.55	1.84	92.39	8.09	0.32	1.81	0.11	0.68	2.86	1.04	2.99	0.53	4.13
148	NDTX060700C-1W	26.68	25.79	1.59	68.14	7.62	0.36	2.18	0.11	0.43	2.86	1.01	3.15	0.67	4.51
149	NDTX071109C-1W	36.23	34.17	2.38	125.77	6.05	0.41	1.97	0.11	0.79	2.9	2.89	3.26	0.74	6.96
150	NDTX071217CB-1W/Y	31.76	30.04	1.98	88.14	7.35	0.47	2.09	0.11	0.31	2.81	1.24	2.87	0.6	4.31
151	NDTX071258B-1R	25.9	24.86	1.64	60.5	9.3	0.24	2.11	0.11	0.75	3.02	0.24	2.5	0.39	1.59
152	NDTX081451CBs-1Y/Y	30.3	28.1	2.33	96.03	6.4	0.36	4.99	0.11	0.74	5.7	0.98	2.49	0.56	3.5
153	NDTX081618-1P/P	30.23	28.73	1.71	82.01	8.52	0.33	1.83	0.11	0.83	2.83	0.94	2.7	0.44	2.88
154	NDTX081644-CAB-2W	23.6	22.69	1.72	53.9	7.98	0.37	1.93	0.11	0.63	3.1	0.78	3.02	0.61	3.53
155	NDTX081648CB-13W	35.46	34.06	1.76	98.07	7.69	0.51	2.17	0.11	0.58	2.98	0.94	3.57	0.66	5.57
156	NDTX081648CB-1W	32.96	31.1	1.87	95.42	8.06	0.35	2.23	0.11	0.65	3.27	0.91	3.15	0.54	4.36
157	NDTX081648CB-4W	35.24	33.09	2.18	108.59	6.62	0.52	4.03	0.11	0.16	4.08	0.48	3.83	0.65	4.85
158	NDTX091886-3P/P	22.09	21.18	1.62	65.82	6	0.39	2.43	0.11	0.17	3.13	0.94	2.75	0.45	2.67
159	NDTX091908AB-2W	38.5	36.17	2.34	97.45	8.16	0.34	3.85	0.11	0.4	3.88	2.41	2.74	0.57	3.99
160	NDTX092237C-2P/W	27.98	24.48	2.51	51.47	11.2	0.68	3.33	0.11	0.95	5.57	0.37	2.53	0.49	1.98
161	NDTX092238Cs-1P/W	24.04	23.22	1.35	58.86	8.8	0.28	1.62	0.11	0.82	2.39	1.09	2.86	0.38	3.08
162	NDTX4271-5R	33.22	31.7	1.68	93.74	7.84	0.23	1.43	0.11	1.32	2.9	0.8	2.92	0.3	3.61
163	NDTX4756-1R/Y	31.66	30.02	1.44	73.93	8.75	0.31	1.45	0.11	0.71	2.26	1.01	3.42	0.43	5.08
164	NDTX4784-7R	33.21	31.6	1.79	95.77	7.65	0.23	1.56	0.11	1.4	3.13	0.94	2.95	0.3	3.81
165	NDTX4828-2R	27.81	27.2	1.04	76.8	8.42	0.26	1.27	0.11	0.6	1.85	1.26	2.61	0.43	3.13
166	NDTX4930-5W	38.41	34.83	3.06	156.9	5.23	0.36	5.35	0.11	0.31	5.1	0.78	3.37	0.59	5.54
167	NDTX5003-2R	31.47	30.55	1.44	75.36	9.58	0.24	0.97	0.11	1.6	2.36	3.09	3.19	0.27	4.84
168	NDTX5067-2R	31.56	30.61	1.46	76.15	9.57	0.24	0.97	0.11	1.62	2.37	3.12	3.19	0.27	4.87
169	NDTX5438-11R	30.96	29.57	1.88	90.03	8.65	0.36	2.31	0.11	0.64	3.57	0.8	3.12	0.51	4.01
170	NDTX6773-1W	34.02	33.16	1.74	108.65	6.26	0.44	2.4	0.11	0.43	3.1	2.21	3.24	0.57	6.94
171	NDTX731-1R	38.72	35.93	2.59	93.51	9.71	0.39	1.41	0.11	2.31	4.22	0.66	2.97	0.39	3.05
172	NDTX7590-3R	30.68	28.6	2.16	92.85	8.43	0.26	1.66	0.11	2.18	4.25	1.51	3.43	0.49	4.24
173	NDTX8773-4Ru	28.19	25.9	2.24	105.67	5.68	0.34	1.89	0.11	1.47	4.52	9.12	2.69	0.56	12.33
174	NDTX91068-11R	36.1	34.68	1.76	109.78	8.32	0.24	1.59	0.11	1.39	2.94	0.21	3.08	0.42	4.23
175	PORTX03PG25-2R/R	21	19.1	2.11	50.42	8.1	0.4	4.51	0.11	0.49	5.3	0.54	2.52	0.67	2.51
176	PTTX05PG07-1W	17.16	16.07	1.83	50.95	5.86	0.51	2.51	0.11	0.4	3.75	0.27	2.57	0.46	2.03
78	Reveille Russet	30.99	27.46	3.11	124.42	5.59	0.35	4.77	0.11	0.79	6.13	1.33	2.79	0.7	4.5
177	Rio Rojo	24.27	23.79	1.2	58.17	10.6	0.29	1.21	0.11	0.66	1.74	1.12	2.79	0.49	3.41
178	Russet Burbank	29.05	24.42	4.17	94.17	5.95	0.51	8.41	0.11	0.28	9.13	0.95	2.95	0.58	4.98
184	Russet Norkotah	29.56	27.53	1.57	129.06	4.46	0.21	2.53	0.11	0.25	2.73	1.41	2.53	0.41	4.53
179	Russet Norkotah 102	29.57	27.55	1.58	128.4	4.49	0.21	2.52	0.11	0.25	2.73	1.42	2.54	0.41	4.55
180	Russet Norkotah 112	29.51	27.48	1.58	128.67	4.48	0.21	2.53	0.11	0.26	2.74	1.43	2.53	0.41	4.55
181	Russet Norkotah 223	29.56	27.53	1.57	128.92	4.47	0.21	2.52	0.11	0.26	2.72	1.43	2.53	0.41	4.54
182	Russet Norkotah 278	29.57	27.54	1.58	129.08	4.46	0.21	2.53	0.11	0.25	2.73	1.41	2.53	0.41	4.53
183	Russet Norkotah 296	29.58	27.55	1.57	128.95	4.47	0.21	2.52	0.11	0.25	2.72	1.41	2.54	0.41	4.55
206	Sierra GoldTM	37.1	34.64	2.22	146.25	6.44	0.52	2.73	0.11	0.77	3.81	2.21	3.17	0.64	7.58
46	Sierra RoseTM	32.1	30.47	1.89	91.59	7.76	0.24	2.83	0.11	0.4	3.24	0.72	3.66	0.83	5.38
185	Stampede Russet	35.25	32.36	2.64	136.35	5.46	0.49	3.09	0.11	1.31	4.63	1.65	2.94	0.6	4.3
186	Tacna	23.86	21.32	2.64	63.92	6.31	0.44	4.66	0.11	0.63	5.75	2.46	3.02	0.52	7.28
187	Tokio	26.59	23.66	2.65	55.49	9.54	0.45	5.06	0.11	0.65	6.13	0.94	3.33	0.48	6.55
188	TX03196-1W	33.24	31.77	1.94	99.17	7.09	0.28	3.32	0.11	0.51	3.53	1.85	3	0.96	5.82
189	TX05249-10W	36.83	33.91	2.8	125.92	6.14	0.31	3.66	0.11	1.8	5.34	1.04	4.11	0.57	8.23
190	TX05249-11W	30.15	29.01	1.95	107.9	5.39	0.28	4.13	0.11	0.74	4.47	1.43	3.03	1.11	6.35
191	TX05249-3W	28.82	28.08	1.61	116.14	4.62	0.3	2.21	0.11	0.8	2.88	0.74	3.01	0.78	4.58
192	TX08350-12Ru	36.39	34.4	2.17	134.32	5.65	0.33	2.52	0.11	0.55	3.37	3.35	2.65	0.86	8.25
194	TX08385-2P/YP	26.88	25.09	2.13	70.64	7.49	0.43	4.12	0.11	0.55	5.52	0.68	2.82	0.48	3.05
195	TX09396-1W	32.95	31.21	2.2	120.62	5.86	0.35	2.26	0.11	0.72	2.87	4.43	3.36	1.16	10.24
210	TX09403-15W	28.53	27.31	1.59	137.6	6.48	0.29	1.77	0.11	0.95	2.7	2.4	5	0.95	9.32
196	TX09403-21W	28.35	27.19	1.57	138.63	6.49	0.29	1.77	0.11	0.94	2.66	2.4	4.97	0.95	9.31
197	TX09414-1W	31.51	30.37	1.64	111.21	6.2	0.35	1.72	0.11	0.54	2.81	2.29	3.49	0.62	9.28
198	TX10437-9Pyspl/Y	23.66	21	2.71	64.33	7.38	0.37	4.92	0.11	1.42	7.3	1.62	3.19	0.33	5.4
199	TX11454-9Ru/Y	31.45	29.01	1.96	127.04	5.15	0.29	2.73	0.11	0.57	3.2	2.48	2.7	0.48	5.85
7	TX11461-2W	40.55	39.09	1.51	101.97	8.3	0.36	1.4	0.11	0.33	1.78	1.97	3.33	0.66	6.54
200	TX11461-3W	39.23	36.98	2.14	99.33	8.24	0.36	2.64	0.11	0.55	3.37	2.38	3.14	0.62	5.56
201	TX12474-1P/R	17.69	17.13	1.31	42.4	7.96	0.43	1.22	0.11	0.24	1.83	0.66	2.42	0.45	1.68
202	TX12484-4W	29.7	28.65	1.58	89.03	7.37	0.31	1.53	0.11	0.57	2.18	1.11	2.48	0.52	2.12
203	TX13590-9Ru	45.42	41.32	3.27	153.77	6.7	0.34	2.62	0.11	1.4	4.63	6.46	2.55	0.93	10.61
204	TX14611-1R	27.34	26.37	1.46	68.17	8.31	0.31	2.05	0.11	0.31	2.81	1.46	3.12	0.45	5.24
205	TX1475-3W	41.28	38.73	2.43	157.22	5.61	0.27	3.93	0.11	0.84	4.5	10.68	3.14	0.87	14.13
207	TX1617-1W/Y	34.2	32.3	1.78	103.32	6.8	0.38	2.68	0.11	0.17	2.95	1.13	3.69	0.74	8.5
208	TX1673-1W/Y	39.39	36.56	2.67	112.5	7.38	0.52	2.98	0.11	0.45	4.15	0.77	3.71	0.56	6.63
209	TX6-1216-1Ru	32.01	29.31	2.28	126.1	4.92	0.28	3.07	0.11	0.85	4.47	3.13	2.55	0.43	6.48
211	TXA549-1Ru	45.39	41.28	3.28	153.68	6.7	0.34	2.62	0.11	1.41	4.66	6.44	2.55	0.94	10.62
212	TXNS106	29.54	27.51	1.57	129.07	4.46	0.21	2.52	0.11	0.26	2.73	1.42	2.53	0.41	4.54
213	TXNS118	29.55	27.52	1.57	129.02	4.46	0.21	2.54	0.11	0.25	2.74	1.41	2.54	0.41	4.54
214	TXNS249	29.54	27.52	1.57	128.68	4.48	0.21	2.53	0.11	0.25	2.72	1.41	2.54	0.41	4.54
215	TXYG79	34.5	31.79	2.42	109.1	6.54	0.4	2.9	0.11	0.67	3.94	4.34	3.01	0.57	7.65
216	UMTX383-3Yrdspl/Y	28.37	26.96	1.58	64.79	8.81	0.23	1.64	0.11	0.76	2.53	0.43	3.25	0.39	3.86
193	Vanguard Russet	41.56	36.98	2.97	136.3	5.94	0.27	2.84	0.11	0.94	3.87	2.56	2.48	0.72	6.1
217	White LaSoda	44.64	39.87	3.79	126.25	7.54	0.64	3.31	0.11	0.92	4.95	1.36	4.12	0.5	7.82

## Sheet: Table S5
Table S5|Standardized (Z-score) selection index for selected individual traits and weighted multi-trait selection index based on the equal priority to total yield and (external and internal) defect traits.
Clone	Market class	Total yield (Z)	Percent tubers with external defects (Z)	Percent tubers with internal defects (Z)	WMIS	WMIS (Z)
AOR07781-2	Russet	2.14	0.45	-1.1	2.78	2.14
Vanguard Russet	Russet	1.82	-0.3	0.35	1.77	1.36
COTX87601-2Ru	Russet	0.69	-0.71	-0.06	1.45	1.12
COTX05095-2Ru/Y	Russet	0.23	-0.32	-0.86	1.41	1.08
ATX85404-8W	Russet	0.08	-0.89	-0.23	1.2	0.92
AOTX03187-1Ru	Russet	-0.14	-0.28	-0.98	1.12	0.86
Krantz	Russet	0.51	0.13	-0.71	1.1	0.84
COTX08322-10Ru	Russet	0.85	-0.49	0.31	1.03	0.79
Stampede Russet	Russet	0.55	0.11	-0.56	1.01	0.77
COTX13215-2Ru	Russet	0.24	-0.59	-0.02	0.85	0.65
ATX99013-1Ru	Russet	-0.59	-0.91	-0.44	0.77	0.59
Russet Norkotah 278	Russet	-0.6	-0.91	-0.45	0.76	0.59
AOTX95295-3Ru	Russet	-0.59	-0.91	-0.45	0.76	0.59
AOTX95265-3Ru	Russet	-0.6	-0.92	-0.44	0.76	0.58
AOTX95265-1Ru	Russet	-0.61	-0.93	-0.44	0.76	0.58
AOTX98137-1Ru	Russet	-0.6	-0.91	-0.44	0.76	0.58
COTX04303-3Ru/Y*	Russet	-0.6	-0.91	-0.44	0.76	0.58
TXNS249	Russet	-0.6	-0.92	-0.44	0.76	0.58
Russet Norkotah 223	Russet	-0.6	-0.92	-0.44	0.76	0.58
Russet Norkotah	Russet	-0.6	-0.91	-0.44	0.76	0.58
Russet Norkotah 296	Russet	-0.59	-0.92	-0.43	0.76	0.58
TXNS106	Russet	-0.6	-0.91	-0.44	0.75	0.58
AOTX96075-1Ru	Russet	-0.6	-0.91	-0.44	0.75	0.58
TXNS118	Russet	-0.6	-0.91	-0.44	0.75	0.58
AOTX98096-1Ru*	Russet	-0.6	-0.91	-0.43	0.75	0.57
Russet Norkotah 102	Russet	-0.6	-0.91	-0.43	0.75	0.57
Russet Norkotah 112	Russet	-0.61	-0.91	-0.44	0.74	0.56
AOTX95265-4Ru	Russet	-0.6	-0.85	-0.47	0.72	0.56
AOTX96208-1Ru	Russet	-0.67	-0.96	-0.4	0.69	0.53
COTX08258-6Ru	Russet	1.92	0.93	0.39	0.6	0.46
AOTX96084-1Ru	Russet	-0.77	-0.89	-0.44	0.57	0.43
ATX9332-8Ru	Russet	-0.7	0.05	-1.29	0.54	0.41
AOTX95265-2Ru	Russet	-0.8	-0.86	-0.44	0.5	0.38
COTX09022-3RuRE/Y	Russet	1.43	0.16	0.87	0.39	0.3
MWTX548-2Ru	Russet	1.44	1.62	-0.51	0.32	0.25
MWTX2609-4Ru	Russet	1.46	1.65	-0.51	0.32	0.24
MWTX2609-2Ru	Russet	1.45	1.65	-0.51	0.31	0.24
AOTX95265-2ARu	Russet	-0.62	-1.4	0.51	0.27	0.2
TX11454-9Ru/Y	Russet	-0.22	-0.66	0.25	0.2	0.15
COTX09052-2Ru	Russet	-0.41	-0.2	-0.39	0.18	0.14
COTX09052-1Ru	Russet	-0.42	-0.19	-0.39	0.16	0.12
Sierra GoldTM	Russet	0.92	-0.33	1.15	0.11	0.08
AOTX05043-1Ru	Russet	-1.59	-0.33	-1.32	0.07	0.05
COTX08063-2Ru	Russet	-0.34	-0.45	0.05	0.06	0.04
ATX9202-3Ru	Russet	-0.61	-0.55	0	-0.06	-0.05
TX08350-12Ru	Russet	0.78	-0.57	1.51	-0.16	-0.12
AOTX98202-1Ru	Russet	0.15	0.32	0.01	-0.17	-0.13
AOTX98152-3Ru	Russet	2.61	0.11	2.72	-0.22	-0.17
TX13590-9Ru	Russet	2.6	0.11	2.75	-0.26	-0.2
TXA549-1Ru	Russet	2.59	0.12	2.75	-0.28	-0.21
ATX84378-6Ru	Russet	0.82	1.65	-0.56	-0.28	-0.21
ATX87184-2Ru	Russet	-0.69	-0.24	-0.09	-0.35	-0.27
COTX10080-2Ru	Russet	-0.34	-0.53	0.57	-0.38	-0.29
AOTX96216-1Ru	Russet	0.49	1.58	-0.69	-0.4	-0.31
ATX9117-1Ru	Russet	-0.54	0	-0.11	-0.43	-0.33
AOTX96216-2Ru	Russet	0.39	1.57	-0.7	-0.48	-0.37
ATX9312-1Ru	Russet	-1.15	0.79	-1.41	-0.53	-0.41
AOTX02136-1Ru	Russet	-0.84	0.51	-0.8	-0.54	-0.42
TX6-1216-1Ru	Russet	-0.1	0.02	0.59	-0.72	-0.55
Reveille Russet	Russet	-0.31	0.91	-0.45	-0.76	-0.59
ATX9130-1Ru	Russet	-0.02	1.57	-0.65	-0.93	-0.72
COTX08121-1Ru	Russet	-0.8	0.59	-0.35	-1.03	-0.79
COTX08121-4Ru	Russet	-0.48	0.2	0.58	-1.26	-0.97
ATX84706-2Ru	Russet	2.3	0.56	3.02	-1.28	-0.98
AOTX97213-1Ru	Russet	-0.22	0.67	0.44	-1.33	-1.02
ATTX98468-5Ru/Y*	Russet	-1.36	0.34	0.26	-1.96	-1.5
COTX09089-1Ru	Russet	-0.18	1.46	1.25	-2.89	-2.22
Russet Burbank	Russet	-0.7	2.51	-0.24	-2.98	-2.28
COTX89044-1Ru	Russet	-0.87	3.3	-0.22	-3.96	-3.04
ATX97147-4Ru	Russet	-0.92	2.43	1.02	-4.37	-3.35
NDTX8773-4Ru	Russet	-0.87	0.05	3.65	-4.57	-3.5
TX11461-2W	Chip	1.39	-1.67	0.13	2.93	2.37
TX12484-4W	Chip	-0.84	-1.29	-1.54	1.99	1.61
NDTX059828-2W	Chip	-1.46	-1.33	-1.97	1.84	1.49
TX11461-3W	Chip	1.12	-0.18	-0.24	1.54	1.24
NDTX091908AB-2W	Chip	0.97	0.3	-0.86	1.53	1.24
NDTX081648CB-13W	Chip	0.34	-0.54	-0.27	1.16	0.93
AOTX95309-1W	Chip	-0.18	-0.75	-0.47	1.04	0.84
NDTX071109C-1W	Chip	0.5	-0.62	0.13	0.99	0.8
NDTX081648CB-1W	Chip	-0.17	-0.27	-0.7	0.8	0.64
ATTX00289-4W	Chip	1.1	0.52	0.18	0.4	0.32
NDTX081648CB-4W	Chip	0.3	0.49	-0.56	0.37	0.3
COTX03187-1W	Chip	-0.37	0.36	-1.04	0.32	0.26
AORTX09037-1W/Y	Chip	0.44	0.96	-0.77	0.25	0.2
TX05249-3W	Chip	-1.03	-0.64	-0.62	0.23	0.18
NDTX6773-1W	Chip	0.05	-0.43	0.25	0.22	0.18
TX03196-1W	Chip	-0.11	-0.03	-0.14	0.05	0.04
NDTX060700C-1W	Chip	-1.47	-0.65	-0.66	-0.15	-0.12
COTX90046-1W	Chip	-0.01	-0.02	0.22	-0.22	-0.18
NDTX4930-5W	Chip	0.95	1.44	-0.27	-0.22	-0.18
COTX90046-5W	Chip	0.12	0.1	0.33	-0.31	-0.25
NDTX081644-CAB-2W	Chip	-2.1	-0.43	-1	-0.68	-0.55
TX09414-1W	Chip	-0.47	-0.7	1.17	-0.94	-0.76
ATTX95490-2W	Chip	2.38	3.31	0.03	-0.95	-0.77
Atlantic	Chip	0.64	-0.06	1.66	-0.96	-0.78
TX09396-1W	Chip	-0.17	-0.65	1.51	-1.04	-0.84
TX09403-21W	Chip	-1.12	-0.84	1.17	-1.45	-1.17
TX09403-15W	Chip	-1.09	-0.8	1.17	-1.45	-1.18
ATTX07042-3W	Chip	-1.13	1.02	-0.62	-1.53	-1.23
TX05249-11W	Chip	-0.75	0.85	0.04	-1.64	-1.33
TX05249-10W	Chip	0.63	1.67	0.75	-1.79	-1.45
TX1475-3W	Chip	1.55	0.88	2.98	-2.31	-1.87
ATTX98448-6R/Y	Red	2.42	-0.14	-0.94	3.5	2.16
ATTX00289-5R/Y	Red	2.41	-0.15	-0.92	3.48	2.15
COTX94218-1R	Red	0.58	-1.32	-1.48	3.38	2.09
ATTX98453-6R	Red	0.63	-0.72	-0.81	2.16	1.33
ATTX98466-5R/WR	Red	0.67	-1.08	-0.39	2.14	1.32
ATTX961014-1R/Y Chimera	Red	0.67	-1.04	-0.42	2.13	1.32
ATTX01178-1R	Red	1.13	-1.08	0.1	2.11	1.3
ATTX98493-1AR	Red	0.26	-0.97	-0.68	1.91	1.18
AOTX91861-4R	Red	2.33	-0.77	1.66	1.44	0.89
BTX2103-1R/Y	Red	0.17	-1.19	0.04	1.33	0.82
ATTX98453-11Br	Red	-0.23	-0.49	-1.01	1.27	0.79
NDTX91068-11R	Red	1.22	-0.1	0.07	1.25	0.77
NDTX4828-2R	Red	-0.69	-1.35	-0.54	1.2	0.74
NDTX731-1R	Red	1.83	1.37	-0.57	1.03	0.64
NDTX4271-5R	Red	0.56	-0.15	-0.28	0.99	0.61
ATTX98453-3R	Red	1.38	-0.31	0.86	0.83	0.51
ATX02263-1R/Y	Red	-1	-0.87	-0.93	0.8	0.49
ATTX98510-1R/Y	Red	0.21	-0.92	0.5	0.63	0.39
COTX02172-1R	Red	-0.16	-0.04	-0.72	0.6	0.37
NDTX4784-7R	Red	0.56	0.12	-0.16	0.6	0.37
NDTX050169-1R	Red	-2.21	-1.19	-1.58	0.57	0.35
NDTX4756-1R/Y	Red	0.2	-0.88	0.51	0.57	0.35
COTX05211-7R	Red	0.82	0.21	0.05	0.56	0.34
NDTX5003-2R	Red	0.16	-0.77	0.44	0.49	0.3
NDTX5067-2R	Red	0.18	-0.76	0.45	0.48	0.3
COTX05261-1R/Y	Red	-0.67	-0.34	-0.8	0.48	0.29
COTX94216-1R	Red	0.54	-0.12	0.23	0.44	0.27
ATTX03516-2R	Red	0.9	-0.33	0.85	0.38	0.23
Rio Rojo	Red	-1.51	-1.48	-0.38	0.36	0.22
BTX2332-1R	Red	0.67	-0.43	0.76	0.34	0.21
NDTX071258B-1R	Red	-1.13	-0.01	-1.38	0.26	0.16
COTX01403-4R/Y	Red	0.3	1.15	-1.01	0.16	0.1
ATTX98491-4Yrdspl/Y	Red	-0.57	-0.6	-0.11	0.14	0.09
ATTX01180-1R/Y	Red	0.38	0.08	0.24	0.06	0.04
COTX02293-4R	Red	-0.82	0.49	-1.22	-0.08	-0.05
AOTX93483-1R	Red	0.57	-0.27	0.93	-0.09	-0.05
NDTX059759-3R/Y Pinto	Red	-1.13	-0.99	0.01	-0.15	-0.09
NDTX050184s-1R/Y	Red	-1.1	-0.08	-0.75	-0.27	-0.16
COTX04193s-2R/Y	Red	-0.85	-0.95	0.38	-0.28	-0.17
ATTX06246-1R	Red	-0.12	0.42	-0.25	-0.29	-0.18
NDTX5438-11R	Red	0.04	0.62	-0.07	-0.52	-0.32
ATTX98462s-3R/Y	Red	0.33	0.26	0.72	-0.65	-0.4
Sierra RoseTM	Red	0.3	0.24	0.71	-0.66	-0.4
AOTX95309-2W*	Red	0.32	0.27	0.72	-0.67	-0.41
ATTX961014-1Br/Y	Red	0.3	0.27	0.72	-0.69	-0.43
COTX05211-4R	Red	-0.49	1.01	-0.77	-0.73	-0.45
NDTX059761-1R/R	Red	-1.28	1.03	-1.57	-0.74	-0.45
COTX05211-5R	Red	-0.49	1.03	-0.77	-0.74	-0.46
ATTX961014-1AR/Y	Red	0.34	0.15	0.97	-0.78	-0.48
ATTX05175s-1R/Y	Red	-1.18	-0.47	0.32	-1.03	-0.63
TX14611-1R	Red	-0.8	-0.25	0.61	-1.15	-0.71
COTX00104-6R	Red	-1.04	-0.18	0.32	-1.18	-0.73
ATTX98444s-16R/Y	Red	-1.41	0.77	-0.84	-1.34	-0.83
COTX10226-1Wpe/Y	Red	-1.46	0.41	-0.46	-1.4	-0.87
ATTX98465-1R/Y	Red	1.54	0.92	2.1	-1.48	-0.92
NDTX7590-3R	Red	-0.03	1.41	0.11	-1.54	-0.95
COTX00104-7R	Red	-0.12	1.52	0.02	-1.67	-1.03
ATX06264s-4R/Y	Red	-0.44	0.98	0.6	-2.03	-1.25
ATTX98514-1R/Y	Red	-2.13	-0.16	0.46	-2.43	-1.5
ATTX96746-1R*	Red	-0.69	2.39	-0.64	-2.45	-1.51
ATTX10265-4R/Y	Red	-0.34	4.58	-1.04	-3.89	-2.4
ATX05186-1R	Red	-0.38	0.65	3.49	-4.52	-2.79
ATTX05186-2R	Red	-0.48	0.62	3.53	-4.63	-2.86
NDTX059886S-1Y/Y	Yellow	0.2	-1.17	-0.81	2.18	1.35
NDTX071217CB-1W/Y	Yellow	0.1	-1.21	-0.77	2.08	1.29
COTX10118-4Wpe/Y	Yellow	0.19	-0.67	-1.18	2.05	1.27
UMTX383-3Yrdspl/Y	Yellow	-0.52	-1.43	-0.9	1.8	1.12
COTX10118-1Wre/Y	Yellow	-0.23	-0.83	-0.85	1.45	0.9
TX1673-1W/Y	Yellow	1.5	-0.19	0.31	1.39	0.86
COTX10138s-7Wpe/Y	Yellow	0.44	-0.75	-0.08	1.27	0.79
BTX1544-2W/Y	Yellow	0.62	-0.4	-0.23	1.24	0.77
White LaSoda	Yellow	2.46	0.42	0.83	1.21	0.75
COTX05249-3W/Y	Yellow	-0.38	-1.4	-0.17	1.19	0.74
COTX10073s-1W	Yellow	0.15	-0.73	-0.23	1.11	0.69
BTX1749-1W/Y	Yellow	0.76	-0.7	0.63	0.83	0.51
JTTX75/2003EH-1Yre/Y	Yellow	-1.12	-1.32	-0.52	0.72	0.44
COTX03079-1W/W	Yellow	1	1.21	-0.9	0.7	0.43
TX1617-1W/Y	Yellow	0.55	-1.11	1.13	0.52	0.33
NDTX059775-1W	Yellow	-0.04	1.44	-1.97	0.49	0.31
TXYG79	Yellow	0.6	-0.35	0.74	0.22	0.13
COTX10012-1Wrdspl/Y	Yellow	0.62	0.14	0.29	0.18	0.11
ATX03496-3Y/Y	Yellow	0.68	1.15	-0.62	0.15	0.1
ATX03564-1Y/Y	Yellow	0.7	1.18	-0.62	0.14	0.09
NDTX081451CBs-1Y/Y	Yellow	-0.17	0.99	-1.09	-0.07	-0.04
COTX03134-1Y/W	Yellow	-0.95	0.96	-1.3	-0.61	-0.38
ATX05202s-3W/Y	Yellow	0.22	0.14	1.31	-1.24	-0.77
ATTX00289-6Y/Y	Yellow	0.77	-0.2	2.37	-1.4	-0.87
ATX91322-2Y/Y	Yellow	-3.15	-1.15	-0.49	-1.51	-0.94
COTX04015-3W/Y	Yellow	-0.26	0.48	1.22	-1.96	-1.21
Tokio	Yellow	-0.85	1.32	0.25	-2.42	-1.5
ATX08181-5Y/Y	Yellow	-0.44	0.28	1.83	-2.54	-1.58
ATX07305S-1Y/Y	Yellow	-0.72	0.68	1.47	-2.88	-1.78
Tacna	Yellow	-1.35	1.03	0.58	-2.95	-1.83
TX10437-9Pyspl/Y	Yellow	-1.38	2.21	-0.24	-3.35	-2.08
NDTX081618-1P/P	Purple	0.73	-0.8	-0.07	1.61	1.47
COTX08039-1P/P*	Purple	-0.05	-1.23	-0.09	1.27	1.16
ATTX88481-1P/W	Purple	1.23	-0.76	0.75	1.23	1.13
ATTX98493-2P/P	Purple	0.49	1.18	-1.91	1.22	1.11
ATTX99325-1P	Purple	1.23	-0.79	0.79	1.22	1.11
ATTX98518-5P/Y	Purple	1.07	-0.57	0.88	0.76	0.69
TX12474-1P/R	Purple	-1.67	-1.31	-1.03	0.66	0.61
ATTX98500-2P/Y	Purple	0.42	0.08	-0.23	0.57	0.52
NDTX092238Cs-1P/W	Purple	-0.46	-1.03	0.07	0.5	0.46
NDTX092237C-2P/W	Purple	0.3	0.6	-0.8	0.5	0.45
NDTX091886-3P/P	Purple	-0.83	-0.65	-0.53	0.34	0.32
ATTX88654-2P/Y	Purple	0.68	-0.24	0.79	0.14	0.13
PTTX05PG07-1W	Purple	-1.77	-0.33	-0.93	-0.52	-0.47
TX08385-2P/YP	Purple	0.09	0.57	0.04	-0.53	-0.48
COTX04050s-1P/P	Purple	0.58	2.03	-0.76	-0.68	-0.62
COTX10138-19P/Y	Purple	1.15	1.07	0.85	-0.77	-0.71
COTX10138-15Wpe/Y	Purple	1.2	-1.01	3.12	-0.91	-0.84
CO112-F2-2P/P	Purple	-1.72	-0.45	-0.1	-1.17	-1.07
PORTX03PG25-2R/R	Purple	-1.04	0.46	-0.3	-1.2	-1.09
COTX08365F-3P/P	Purple	-0.66	1.91	-0.82	-1.75	-1.6
ATTX98500-3P/Y	Purple	-0.95	1.25	0.27	-2.48	-2.27
Weighted multi-trait index selection (WMIS) = (1) * 𝑍𝑖 𝐺𝐸𝐵𝑉 Total yield - (1) * 𝑍𝑖 𝐺𝐸𝐵𝑉 Percent tubers with external defects - (1) * 𝑍𝑖 𝐺𝐸𝐵𝑉 Percent tubers with internal defects; The weight given to each trait is subjective and at the discretion of each breeder.
Standardized Weighted multi- trait index selection: WMIS(Z) =
